# Supplementary material for: Regioselective N1-ribosylation of hydantoin: synthesis and properties of the first contracted uridine analog
Source: Royal Society of Chemistry journal article supplement (doi:10.1039/d4cc06033d), 2024-12-17
Supplement: d4cc06033d1.pdf [file d4cc06033d1.pdf]

**Regioselective N1-Ribosylation of Hydantoin: Synthesis and Properties of the First Contracted Uridine Analog**

**Supplementary Material**

Odai Bsoul<sup>a</sup>, Yakir Lampel<sup>a</sup>, Maayan Rofe<sup>a</sup>, Natalie Pariente-Cohen<sup>a</sup>, Chen Timsit<sup>a</sup>, and Bilha Fischer<sup>a\*</sup>

<sup>a</sup> Department of Chemistry, Bar-Ilan University, Ramat-Gan 52900, Israel.

\* Corresponding author. Tel: 972-3-5318303

Bar-Ilan University, Ramat-Gan 52900, Israel

[Bilha.fischer@biu.ac.il](mailto:Bilha.fischer@biu.ac.il)

**Keywords:** N1 hydantoinyl ribose, regioselective synthesis, Vorbrüggen reaction, conformational analysis, pK<sub>a</sub>, base stacking, base pairing

## Table of contents

### Figures

Fig. S1 Molecular recognition of the uracil ring in uridine by proteins (A) and expansion of the recognition pattern by uridine mimics (B).

Fig. S2. 500 MHz  $^1\text{H-NMR}/^{13}\text{C-NMR}/\text{DEPT}$  spectra in  $\text{CDCl}_3$ , 300 K, of (2*R*,3*R*,4*R*,5*R*)-2-((benzoyloxy)methyl)-5-(2,5-dioxoimidazolidin-1-yl)tetrahydrofuran-3,4-diyl dibenzoate (**8**).

Fig. S3. 700 MHz  $^1\text{H-NMR}/^{13}\text{C-NMR}/\text{DEPT}$  spectra in  $\text{CDCl}_3$ , 300 K, of (2*R*,3*R*,4*R*,5*R*)-2-((Benzoyloxy)methyl)-5-(2,4-dioxoimidazolidin-1-yl)tetrahydrofuran-3,4-diyl dibenzoate (**9**).

Fig. S4. 700 MHz  $^1\text{H-NMR}/^{13}\text{C-NMR}/\text{DEPT}$  spectra in  $\text{D}_2\text{O}$ , 300 K, of Hydantoinyl Ribose (**15**).

Fig. S5. Definitions of nucleoside's ribose pucker and exocyclic methylol rotamers in solution.

Fig. S6. pH-dependent hydrolytic stability of HR at RT under A.1) pH 1.4 A.2) pH 13, monitored by  $^{13}\text{C}$  NMR (A), Ionization and hydrolysis of HR under basic pH (B), Sigmoidal dependance of the chemical shift of C.1) C2 and C.2) C4 on pH.

Fig. S7. NMR studies of base-pairing of HR with Adenosine (A.1) and with Guanosine (A.2). Enlarged view of Fig. S7.A.1/2 (B).

Fig. S8. 400 MHz  $^1\text{H-NMR}/^{13}\text{C-NMR}/\text{DEPT}$  spectra in  $\text{CDCl}_3$ , 300 K, of 2,5-Bis((tert butyldimethylsilyl)oxy)- 4*H*-imidazole (**16**).

Fig. S9. 400 MHz  $^1\text{H-NMR}/^{13}\text{C-NMR}/\text{DEPT}$  spectra in DMSO, 300 K, of 3-(2,5-Dioxoimidazolidin-1-yl)propanenitrile (**12**).

Fig. S10. 300 MHz  $^1\text{H-NMR}/^{13}\text{C-NMR}/\text{DEPT}$  spectra in  $\text{CDCl}_3$ , 300 K, of 2,5-bis((*tert*-butyldiphenylsilyl)oxy)-4*H*-imidazole (**17**).

Fig. S11. 400 MHz  $^1\text{H-NMR}/^{13}\text{C-NMR}/\text{DEPT}$  spectra in  $\text{CDCl}_3$ , 300 K, of 2,5-bis((Triisopropylsilyl)oxy)-4*H*-imidazole (**18**).

Fig. S12. 300 MHz  $^1\text{H-NMR}/^{13}\text{C-NMR}/\text{DEPT}$  spectra in  $\text{CDCl}_3$ , 300 K, of (2*R*,3*R*,4*R*,5*R*)-2-((Benzoyloxy)methyl)-5-(3-(2-cyanoethyl)-2,4dioxoimidazolidin-1-yl)tetrahydrofuran-3,4-diyl dibenzoate (**14**).

### Tables

Table S1. Crystal data and structure refinement for HR.

Table S2. Fractional Atomic Coordinates ( $\times 10^4$ ) and Equivalent Isotropic Displacement Parameters ( $\text{\AA}^2 \times 10^3$ ) for HR.  $U_{\text{eq}}$  is defined as 1/3 of the trace of the orthogonalised  $U_{ij}$  tensor.

Table S3. Anisotropic Displacement Parameters ( $\text{\AA}^2 \times 10^3$ ) for HR. The Anisotropic displacement factor exponent takes the form:  $-2\pi^2[h^2a^2U_{11}+2hka*b*U_{12}+\dots]$ .

Table S4. Bond Lengths for HR.

Table S5. Bond Angles for HR.

Table S6. Torsion Angles for HR.

Table S7. Hydrogen Atom Coordinates ( $\text{\AA} \times 10^4$ ) and Isotropic Displacement Parameters ( $\text{\AA}^2 \times 10^3$ ) for HR.

Table S8. Chemical shifts and coupling constants of HR and uridine (U) in  $D_2O$  solution.

Table S9. Chemical shifts (ppm) for monomeric ( $\delta_0$ ) and self-stacked ( $\delta_\infty$ ) HR and uridine.

### Equations

Eqn. S1. Equations used for the calculation of *S/N* conformers population.

Eqn. S2. Equations used for the calculation of populations of conformers *gg*, *tg*, and *gt*.

Eqn. S3. An equation used for the calculation of the glycosidic angle of hydantoinyl-ribose.

### Experimental

### References

---

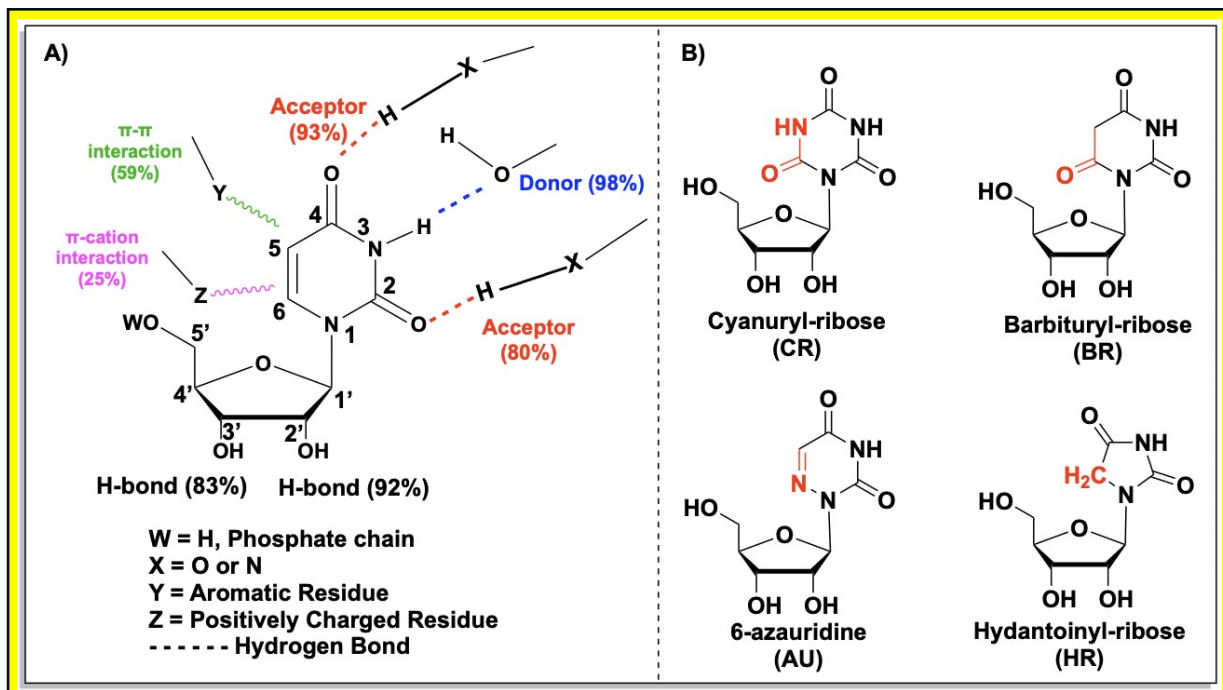

Figures

Fig. S1. Molecular recognition of the uracil ring in uridine by proteins (A)<sup>1</sup> and expansion of the recognition pattern by uridine mimics (B).<sup>2</sup>

8.0902  
8.0751  
7.9510  
7.9329  
7.9146  
7.5436  
7.5287  
7.5141  
7.4109  
7.3955  
7.3802  
7.3618  
7.3471  
7.3323  
6.3126  
6.3057  
6.3009  
6.2939  
6.0857  
6.0731  
6.0605  
5.9431  
5.9363  
4.7648  
4.7576  
4.7417  
4.7347  
4.6795  
4.6723  
4.6673  
4.6598  
4.6430  
4.6320  
4.6197  
4.6090  
3.9894

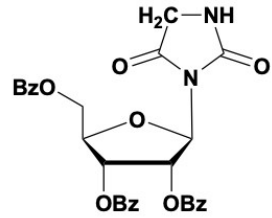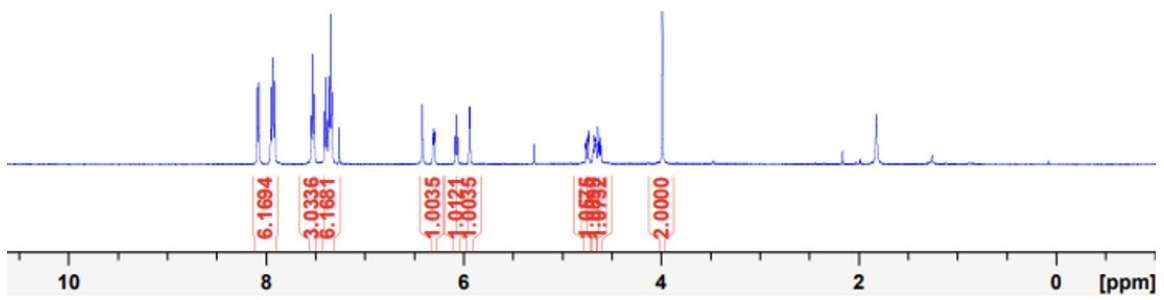

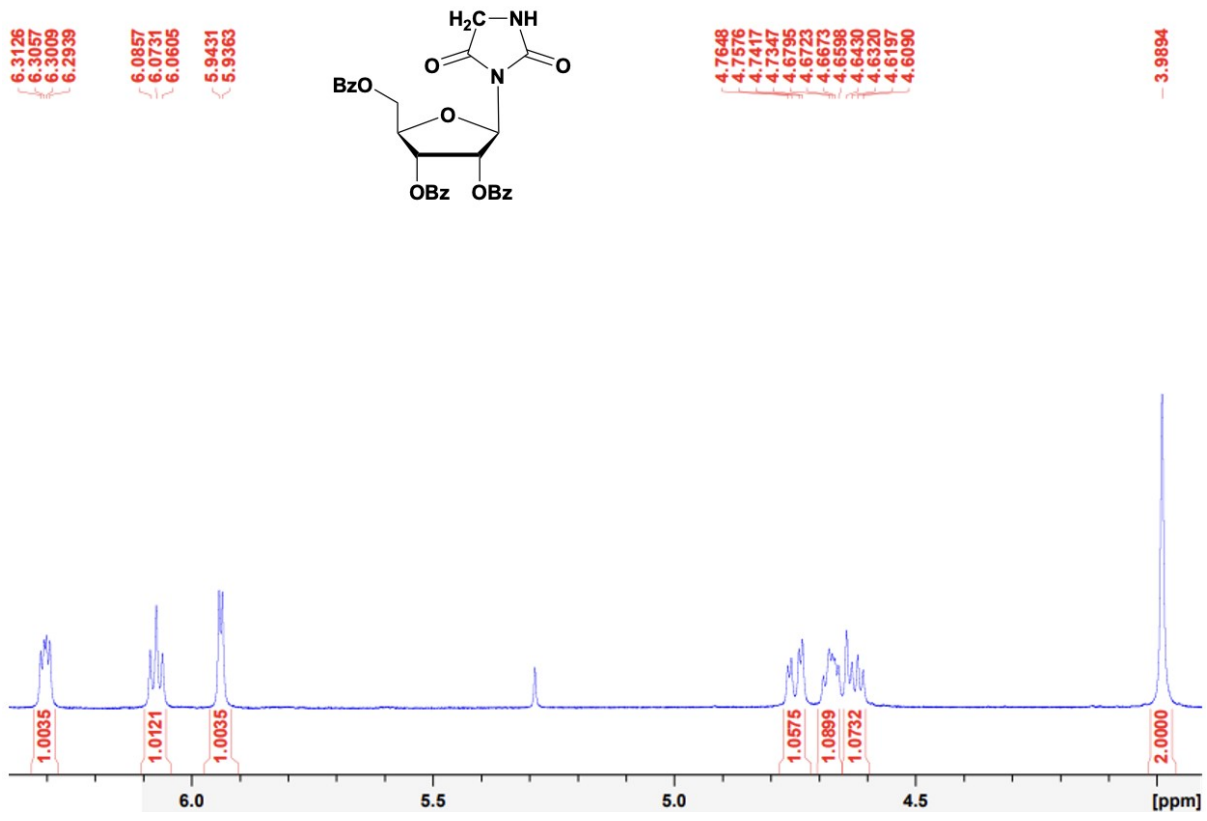

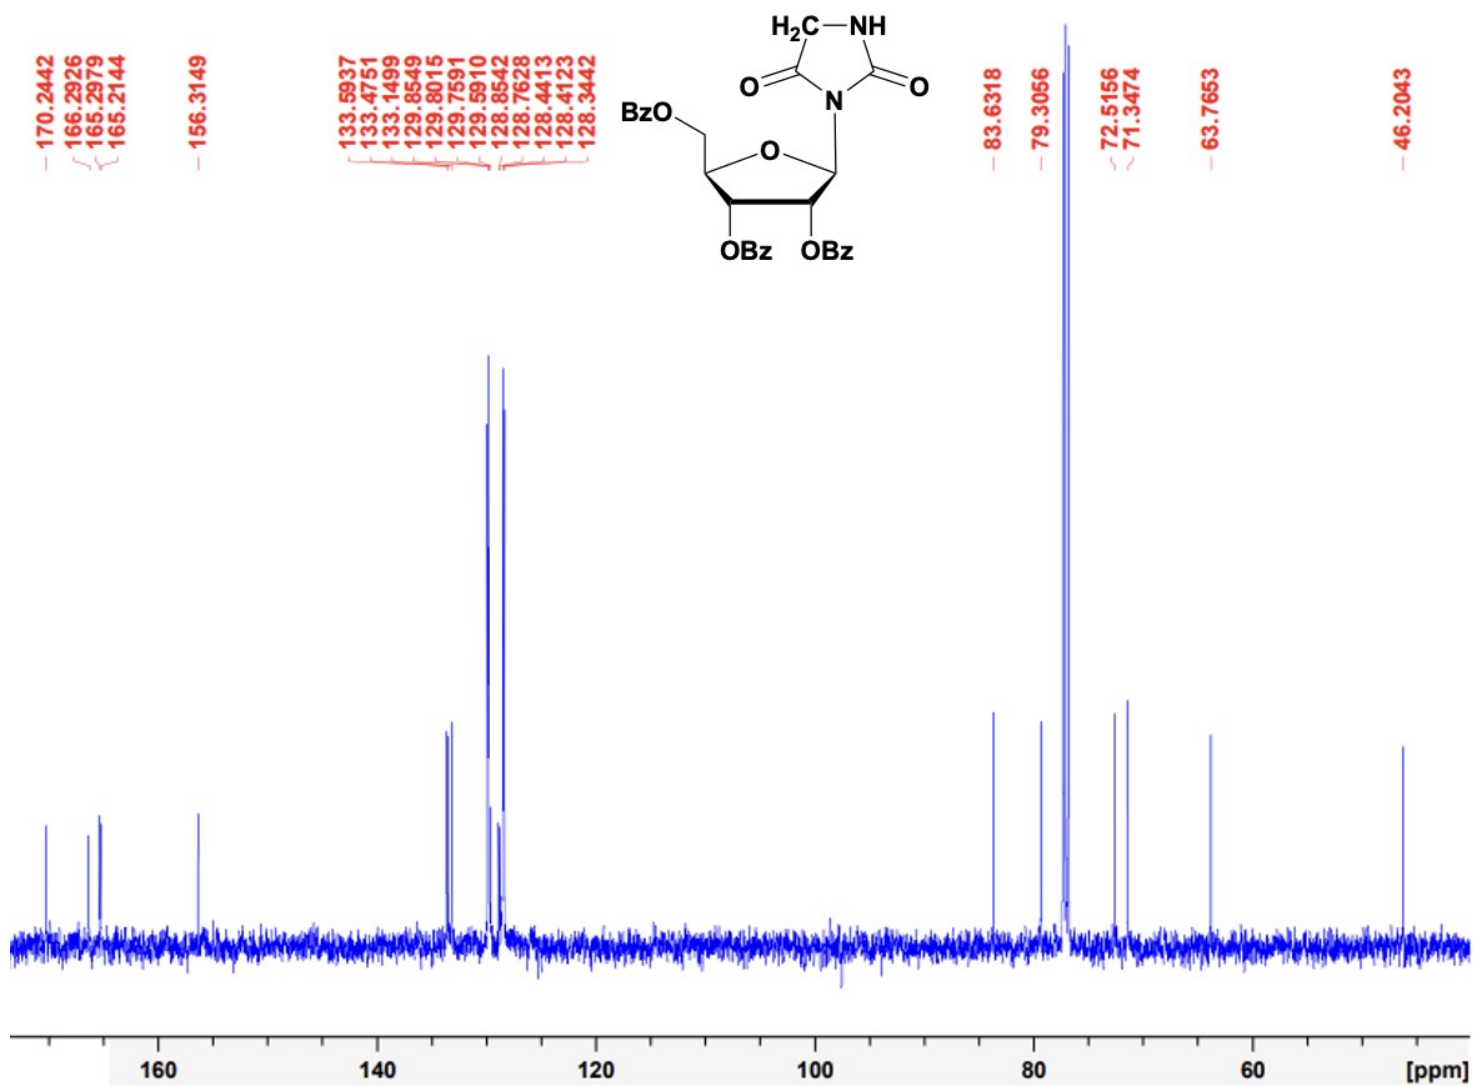

133.5974  
133.4790  
133.1542  
129.8568  
129.8026  
129.7608  
128.4435  
128.4146  
128.3473

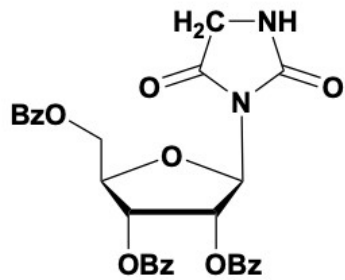

83.9894  
83.6284

79.3021

72.5148  
71.3423

63.7631

46.2043

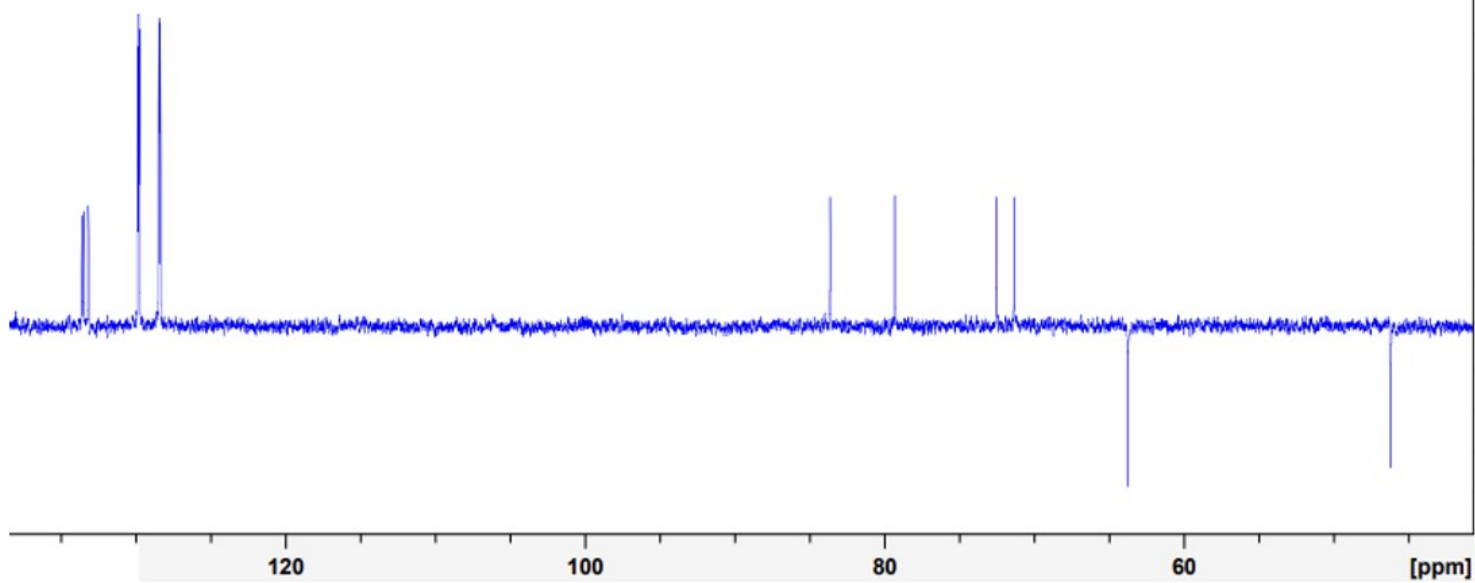



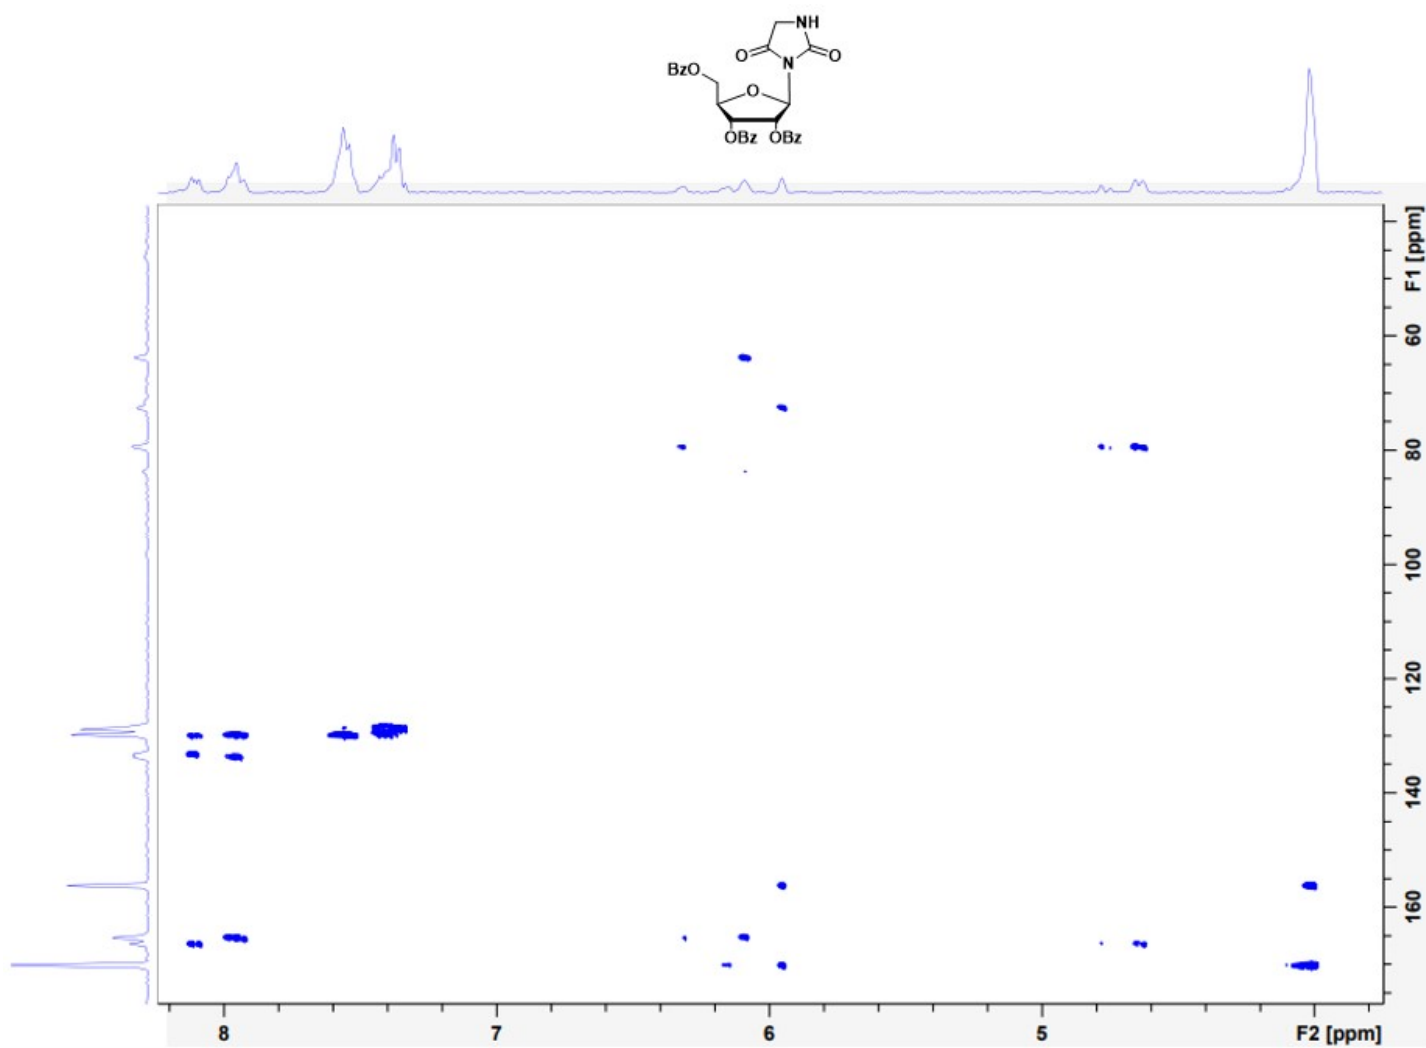

Fig. S2. 700 MHz <sup>1</sup>H-NMR/<sup>13</sup>C-NMR/DEPT/HMBC spectra in CDCl<sub>3</sub>, 300 K, of (2R,3R,4R,5R)-2-((benzyloxy)methyl)-5-(2,5-dioxoimidazolidin-1-yl)tetrahydrofuran-3,4-diyl dibenzoate (8).

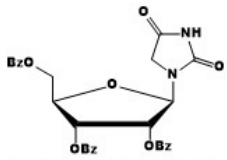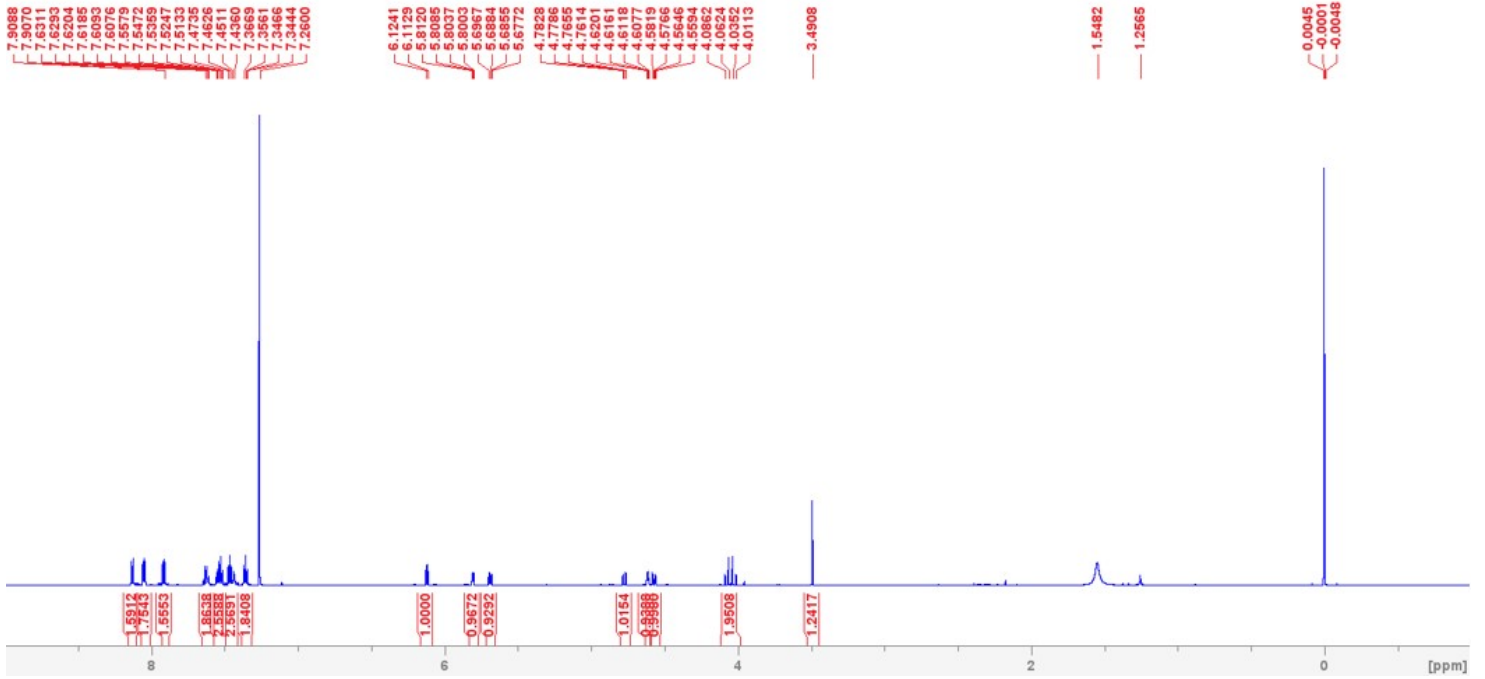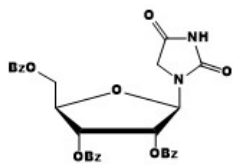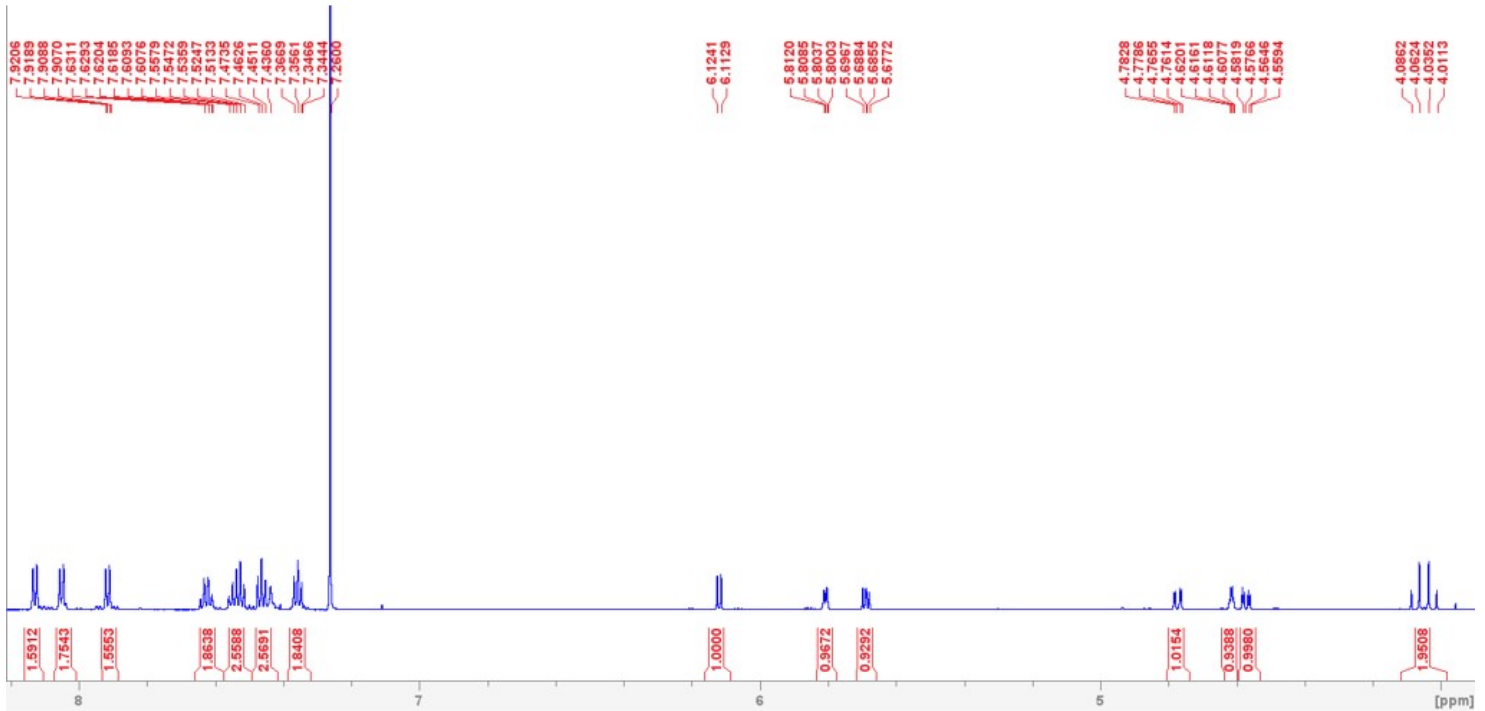

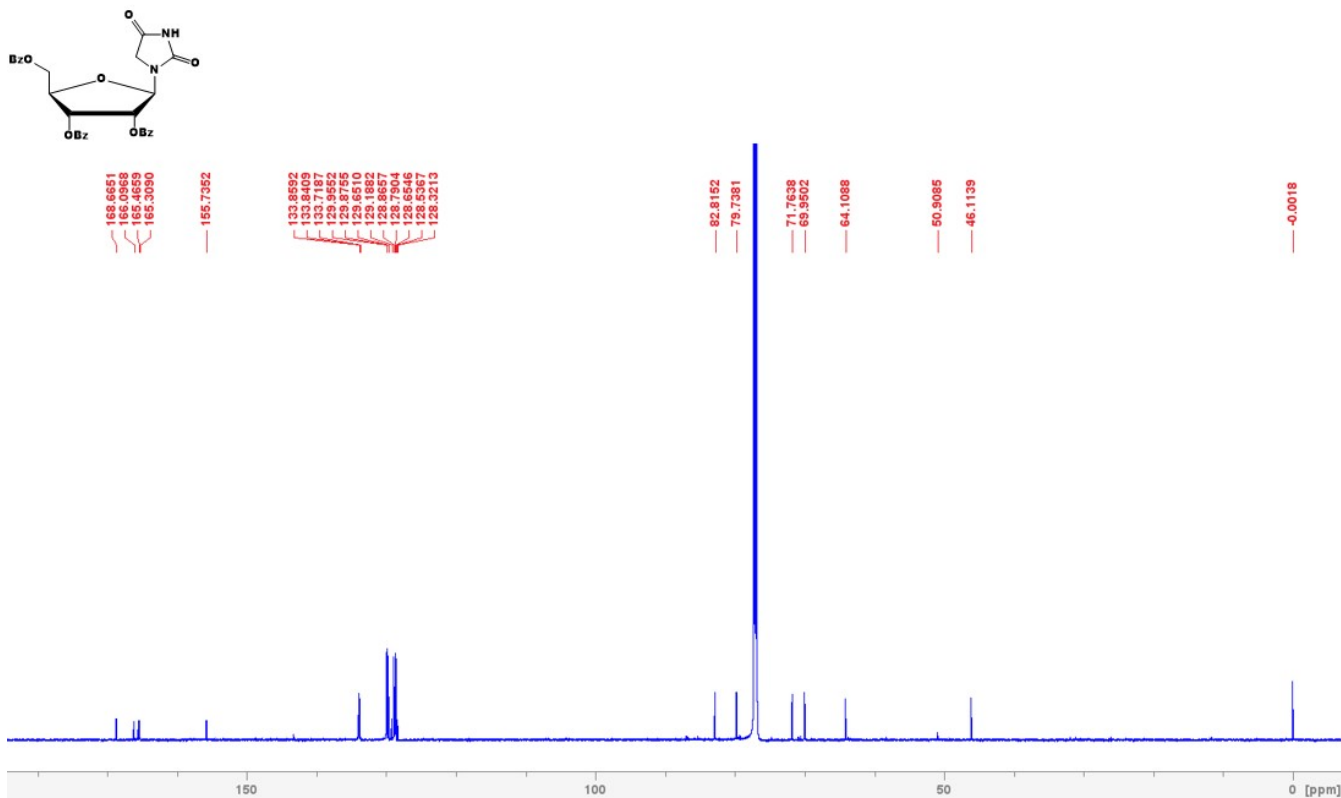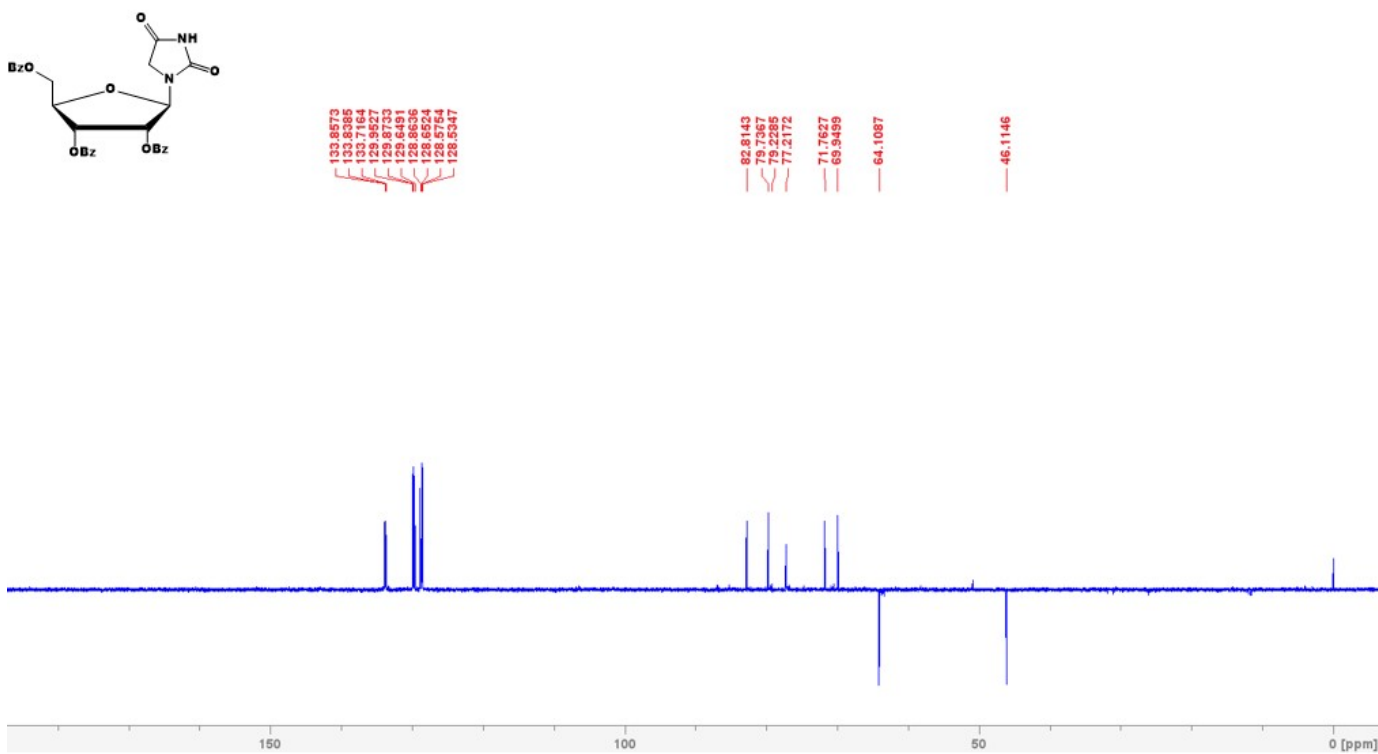

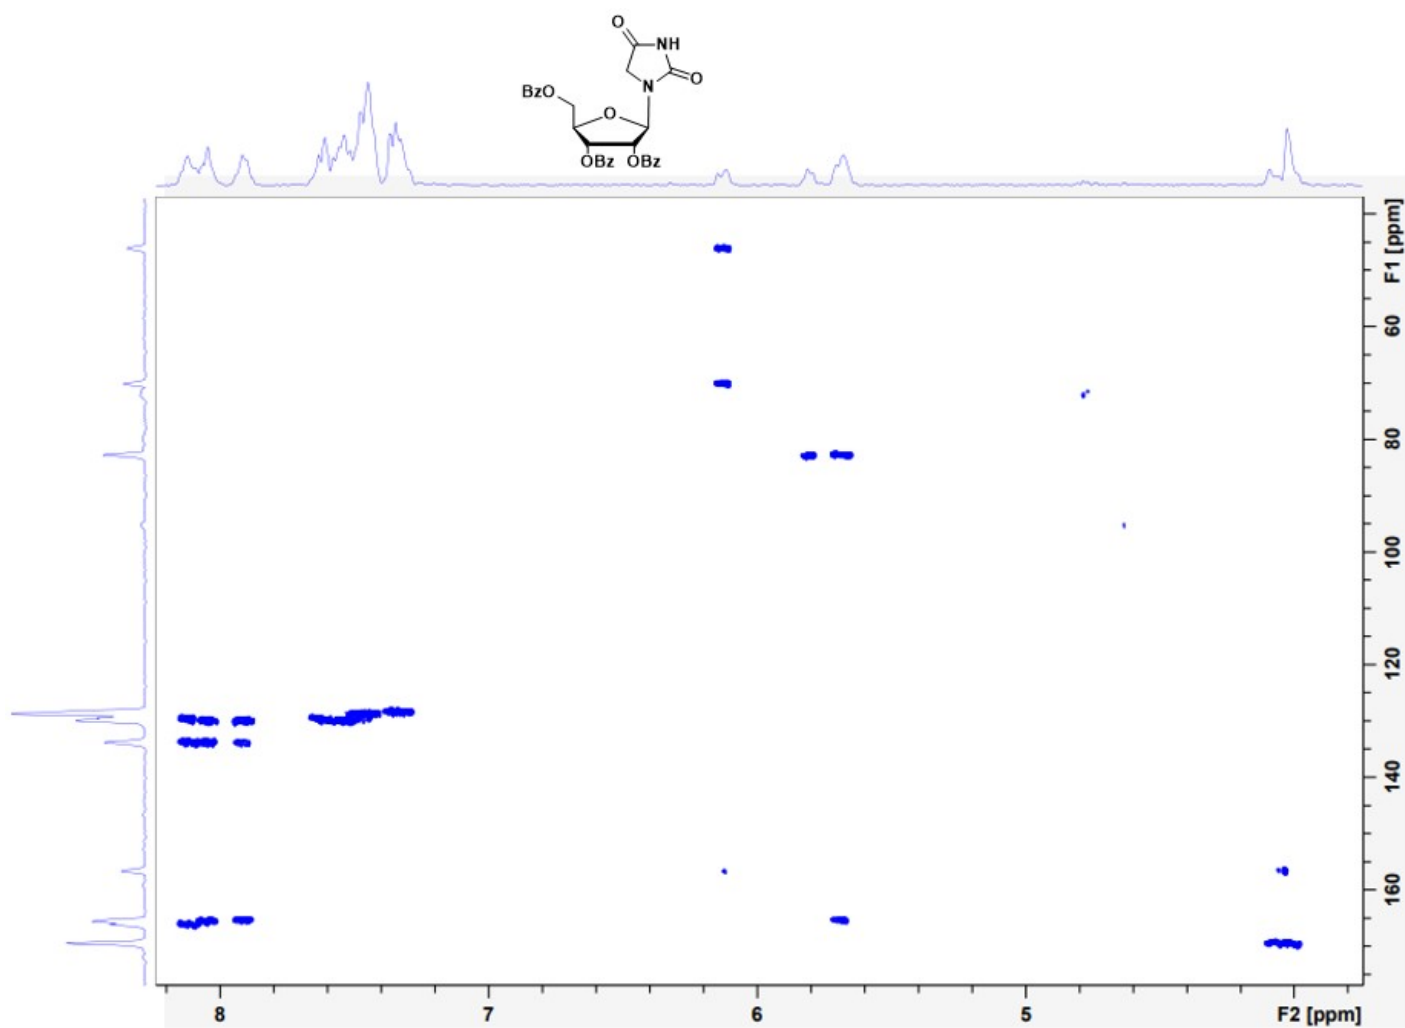

Fig. S3. 700 MHz  $^1\text{H}$ -NMR/ $^{13}\text{C}$ -NMR/DEPT/HMBC spectra in  $\text{CDCl}_3$ , 300 K, of (2R,3R,4R,5R)-2-((Benzoyloxy) methyl)-5-(2,4-dioxoimidazolidin-1yl)tetrahydrofuran-3,4-diyldibenzoate (9).

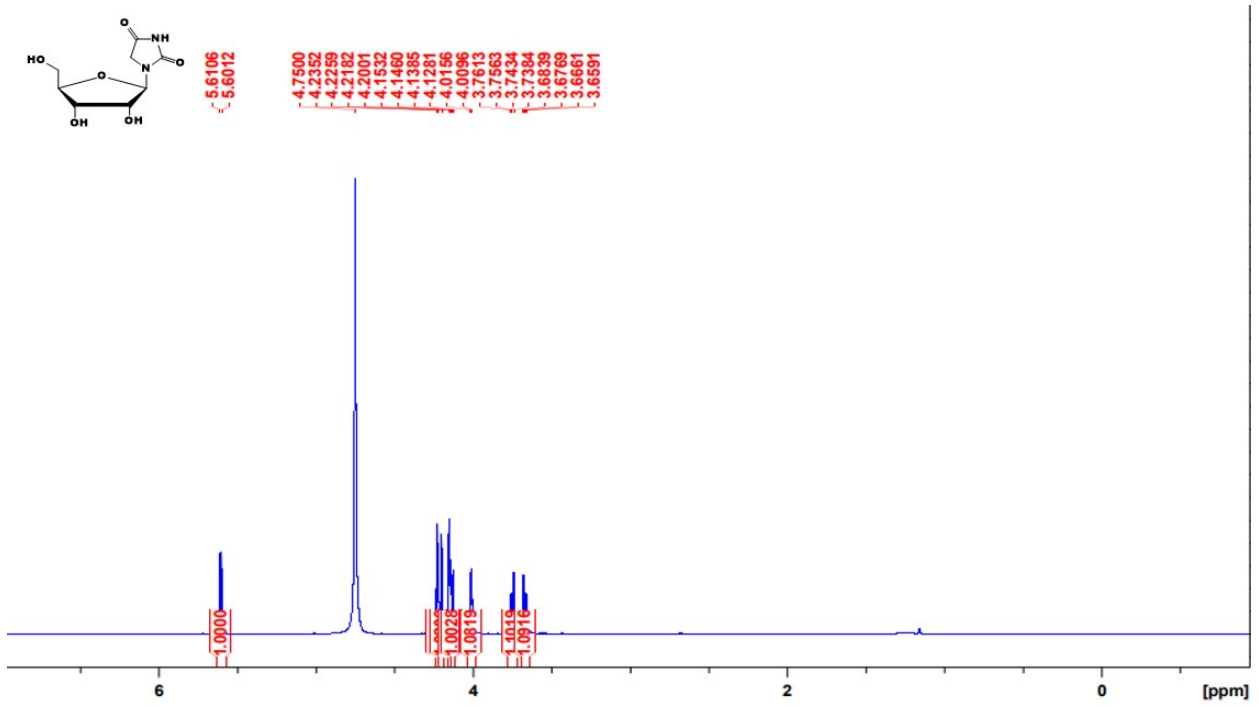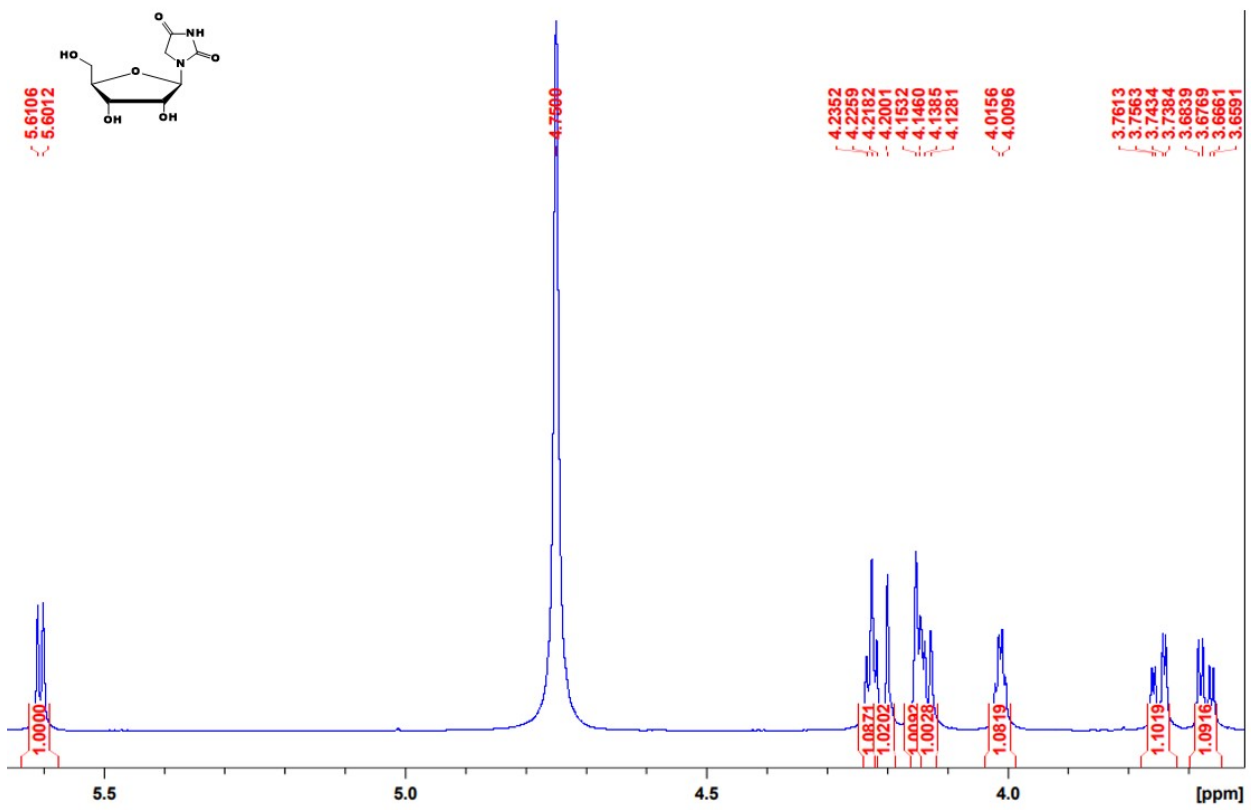

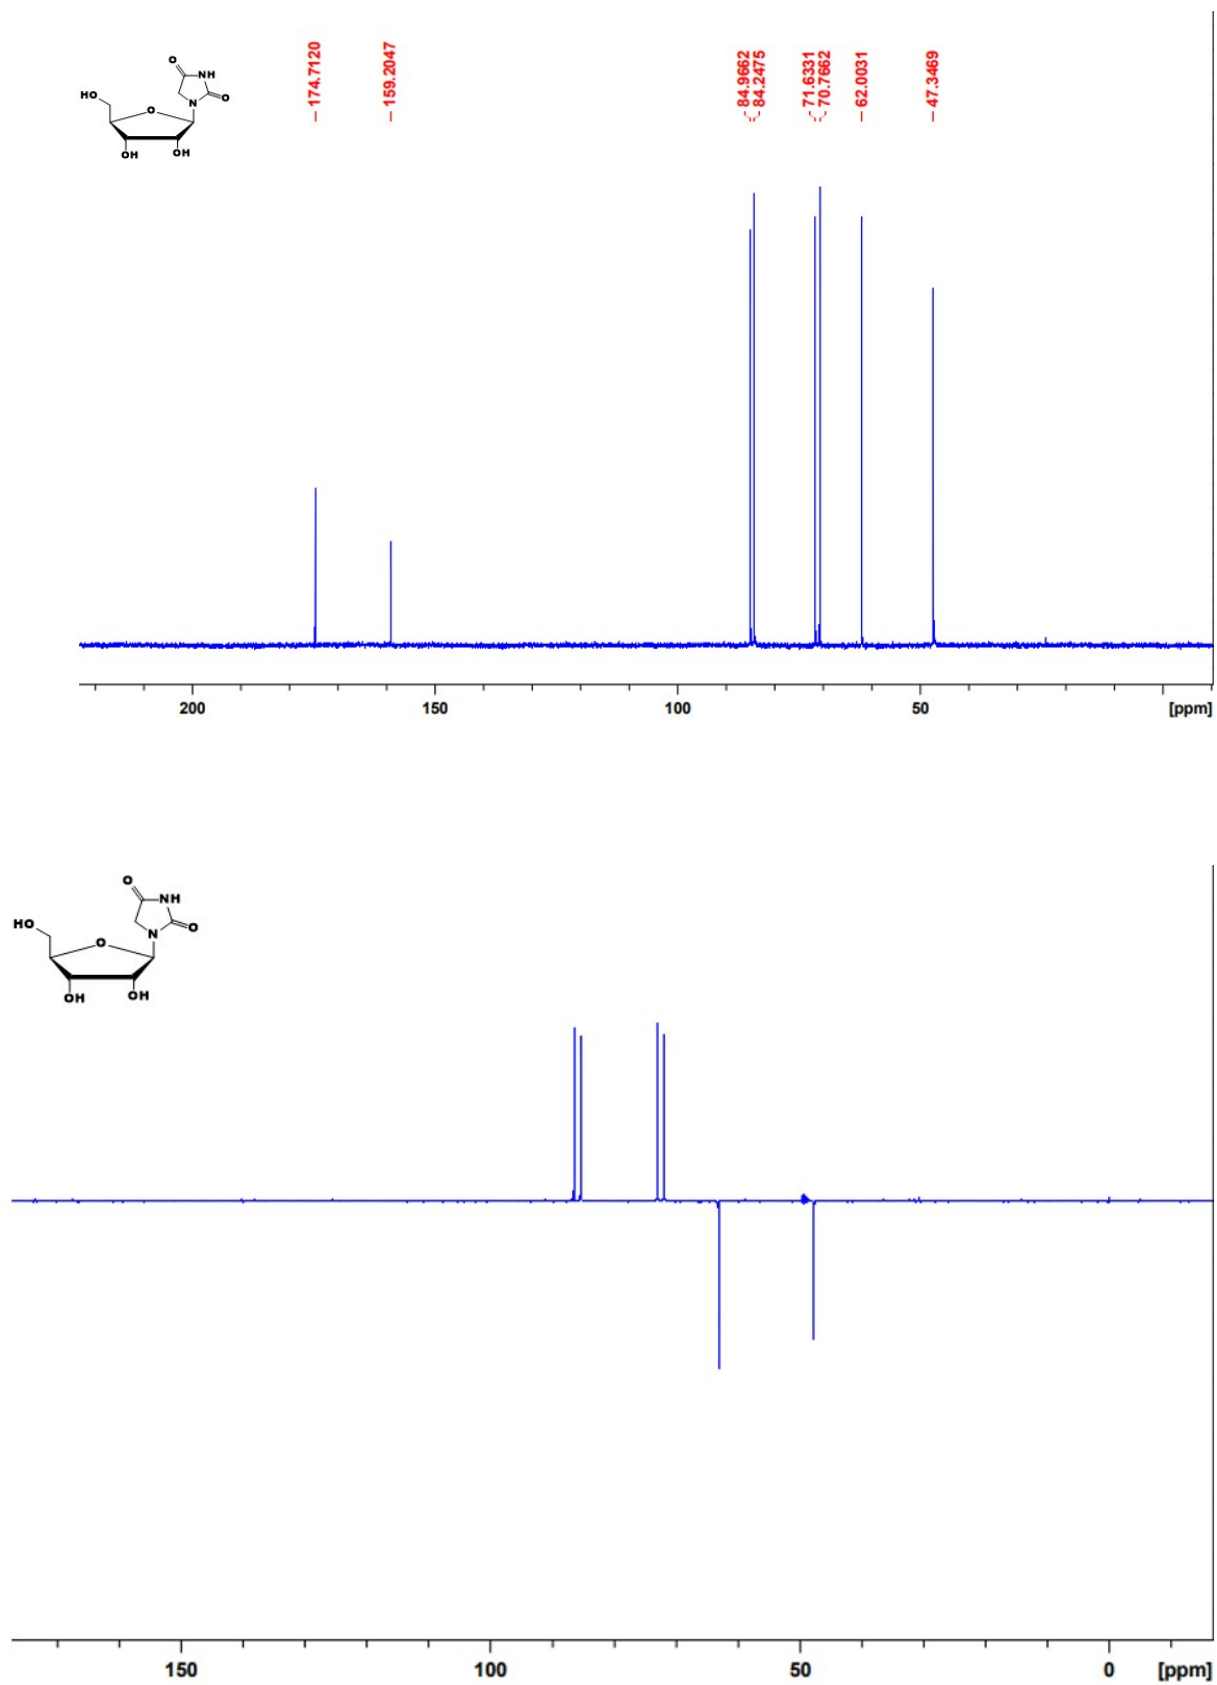

Fig. S4. 700 MHz <sup>1</sup>H-NMR/<sup>13</sup>C-NMR/ DEPT spectra in D<sub>2</sub>O, 300 K, of Hydatoinyl Ribose (15).

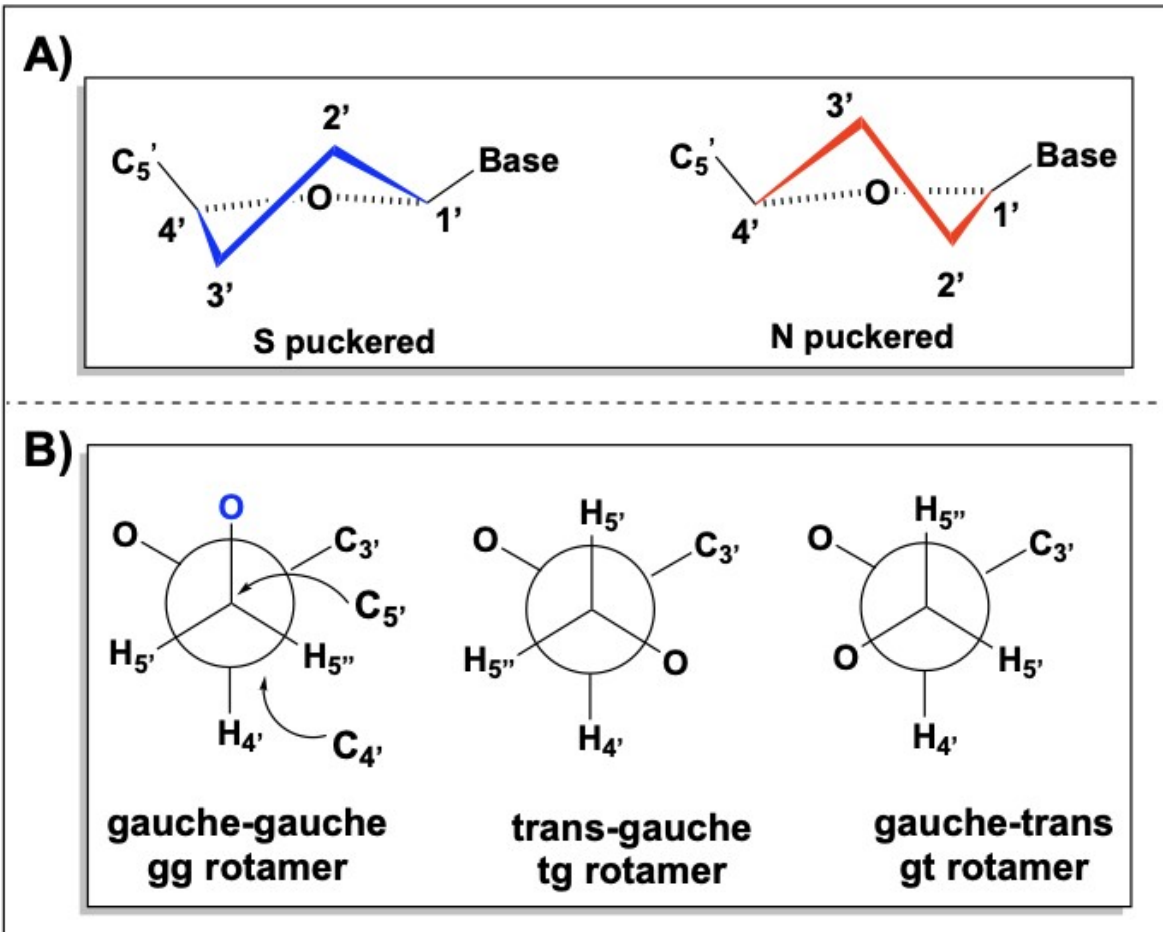

Fig. S5. Solution conformation of ribose in nucleoside is composed of equilibrating *N* and *S* conformers (A). Conformation of exocyclic CH<sub>2</sub>OH is composed of three equilibrating rotamers, *gg*, *gt*, and *tg* (B).

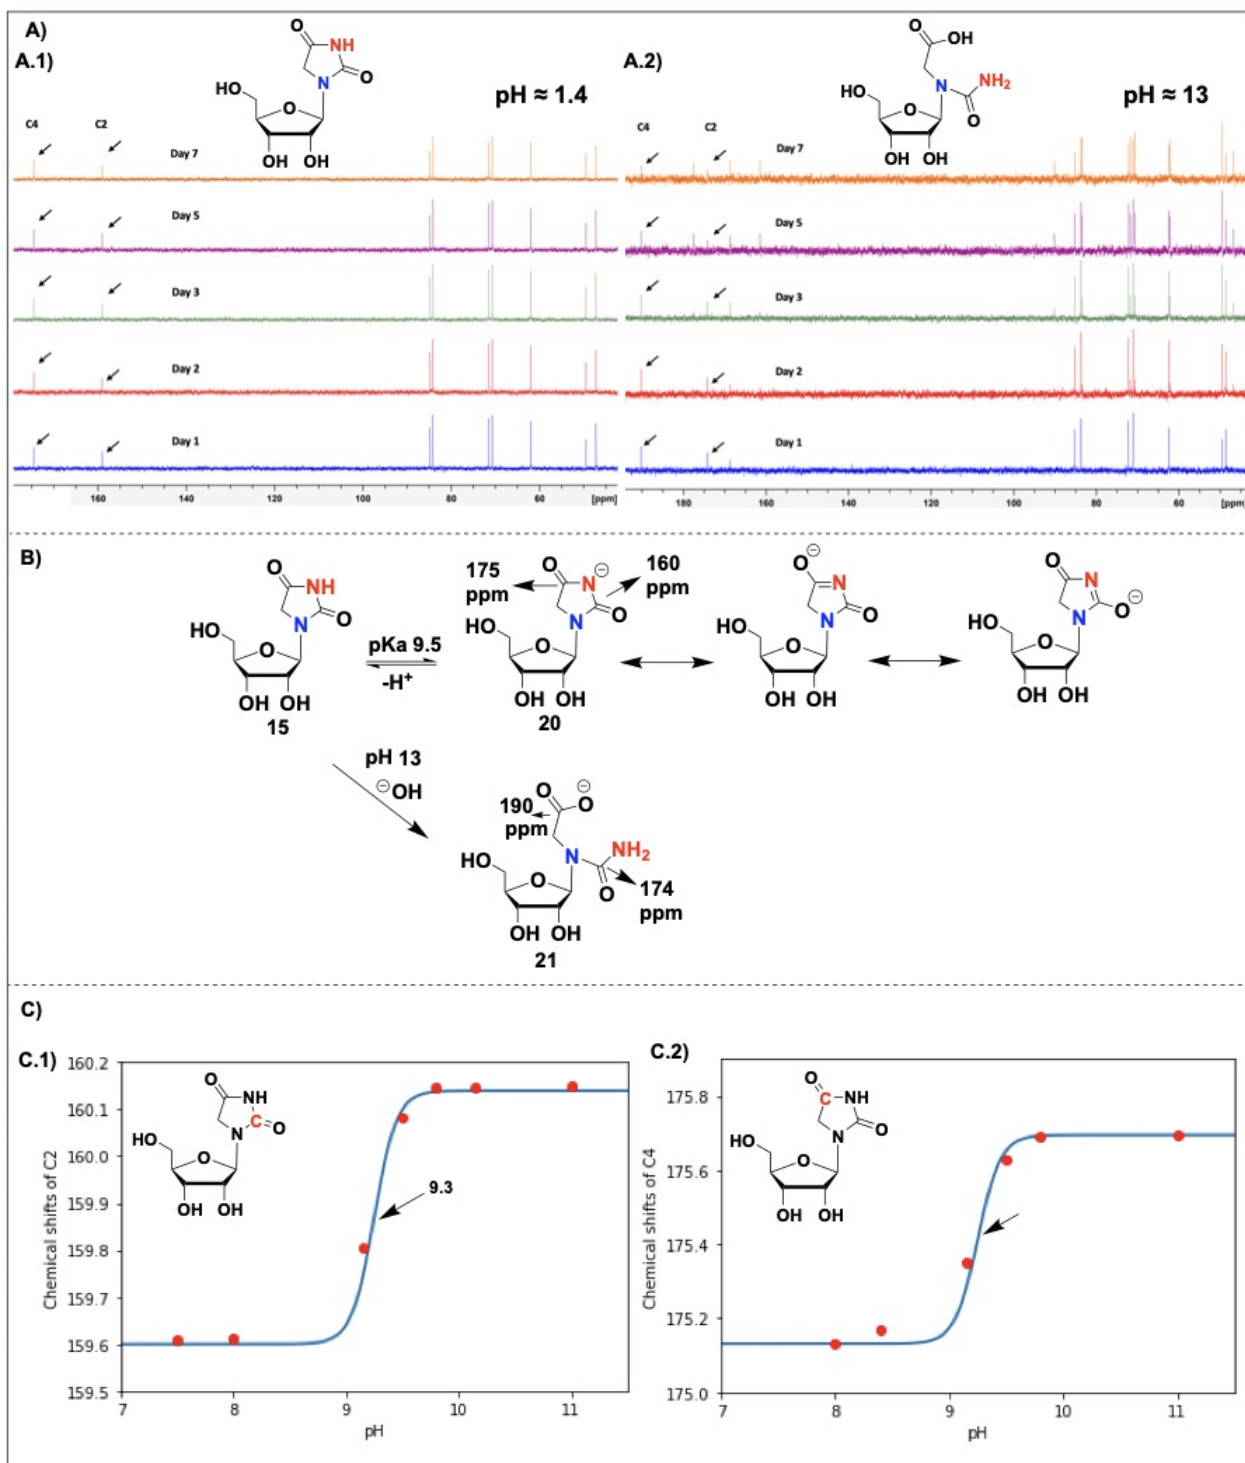

Fig. S6. pH-dependent hydrolytic stability of HR at RT under A.1) pH 1.4 A.2) pH 13, monitored by  $^{13}\text{C}$  NMR (A), Ionization and hydrolysis of HR under basic pH (B), Sigmoidal dependance of the chemical shift of C.1) C2 and C.2) C4 on pH (C).



A)

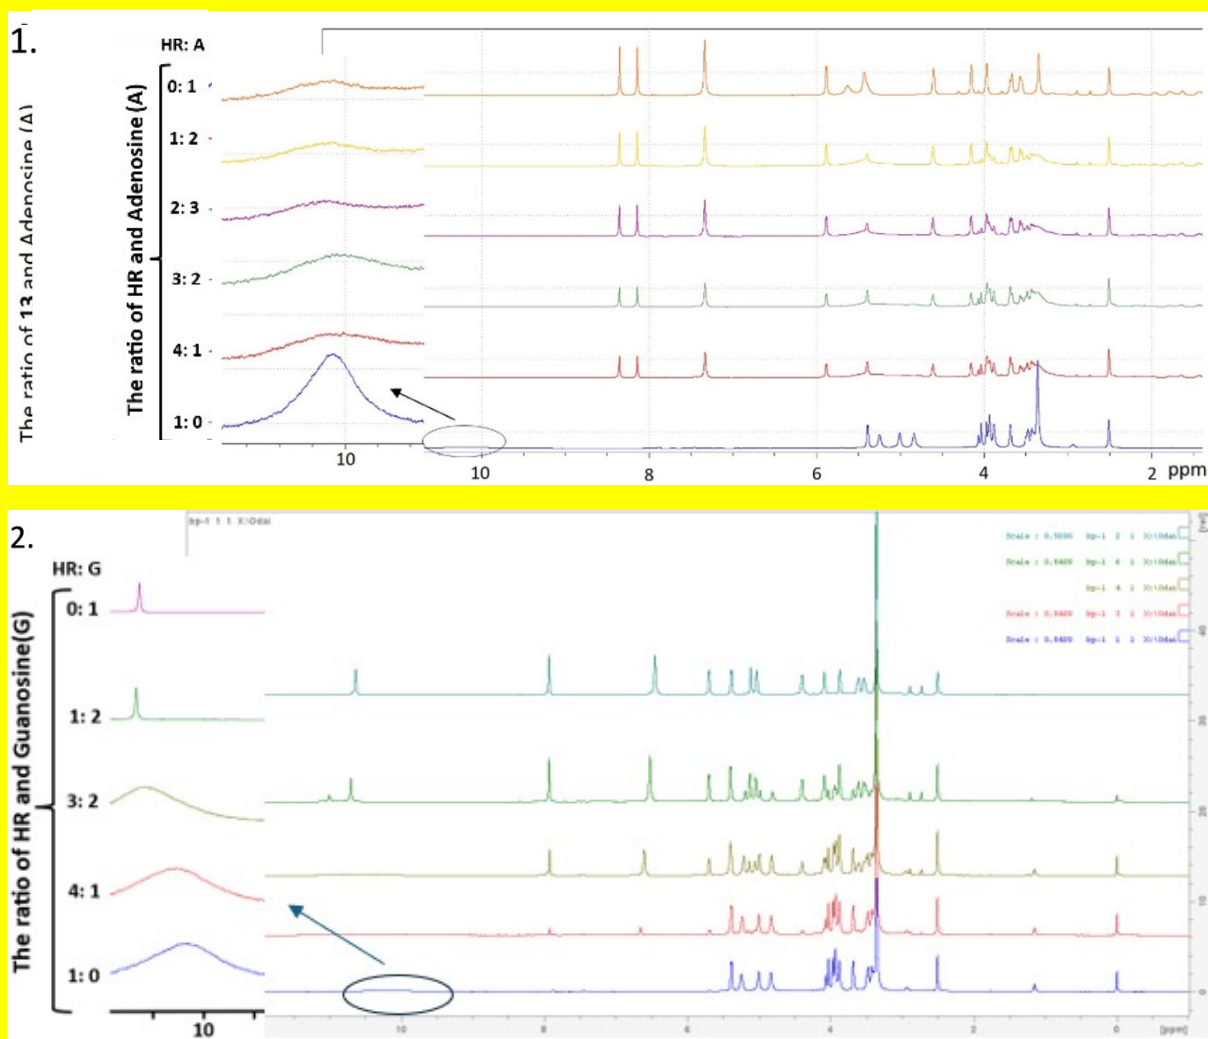

B)

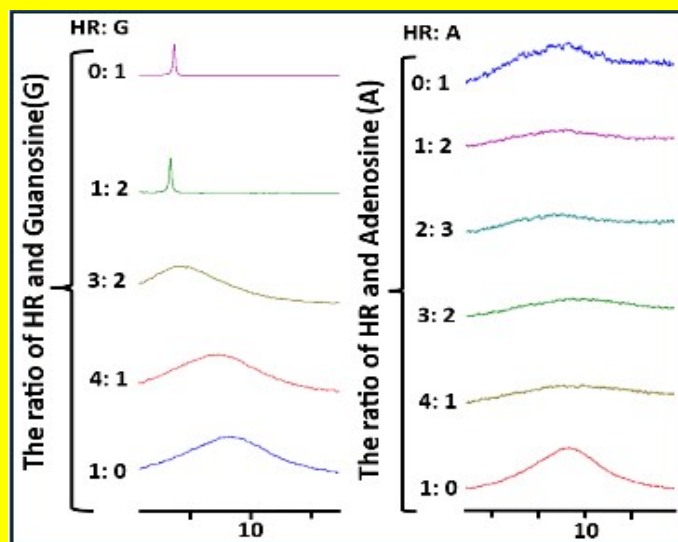

Fig. S7. 0.1 M HR and A.1) 0.1 M adenosine or A.2) 0.1 M guanosine in DMSO-*d*<sub>6</sub>. <sup>1</sup>H NMR spectra were measured in dry DMSO-*d*<sub>6</sub> at 500 MHz. The data were collected at 300 K. <sup>1</sup>H-NMR spectra were obtained at a range of HR:A ratios (A), Enlarged view of Fig. S7.A.1/2 (B).

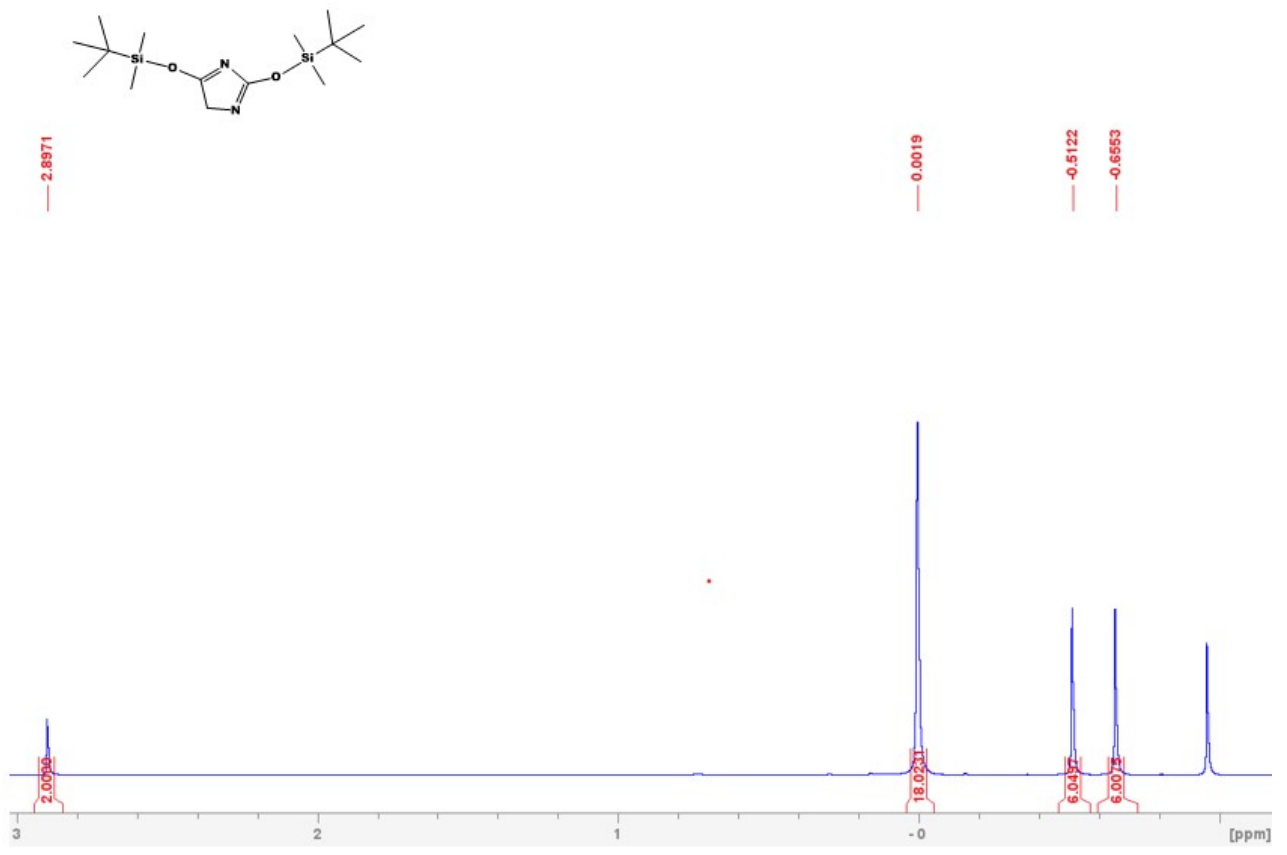

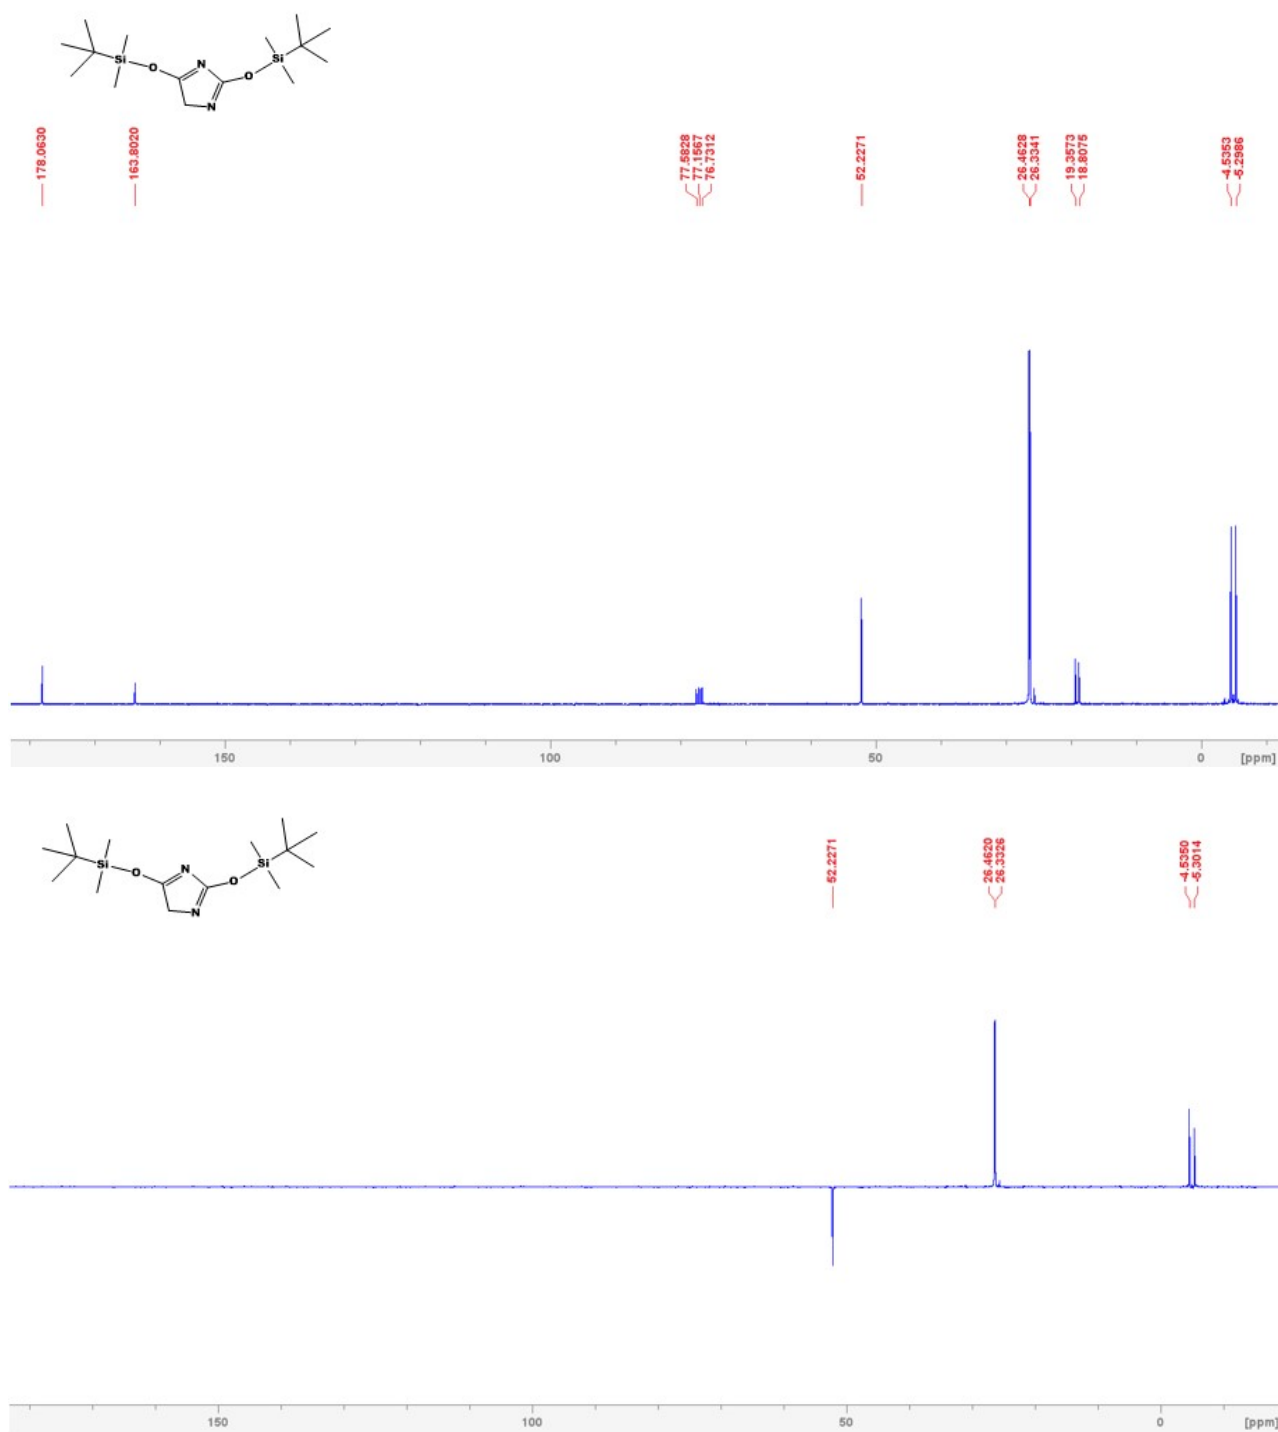

Fig. S8. 400 MHz  $^1\text{H}$ -NMR/ $^{13}\text{C}$ -NMR/ DEPT spectra in  $\text{CDCl}_3$ , 300 K, of 2,5-Bis((tert butyldimethylsilyl)oxy)- 4H-imidazole (16).

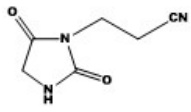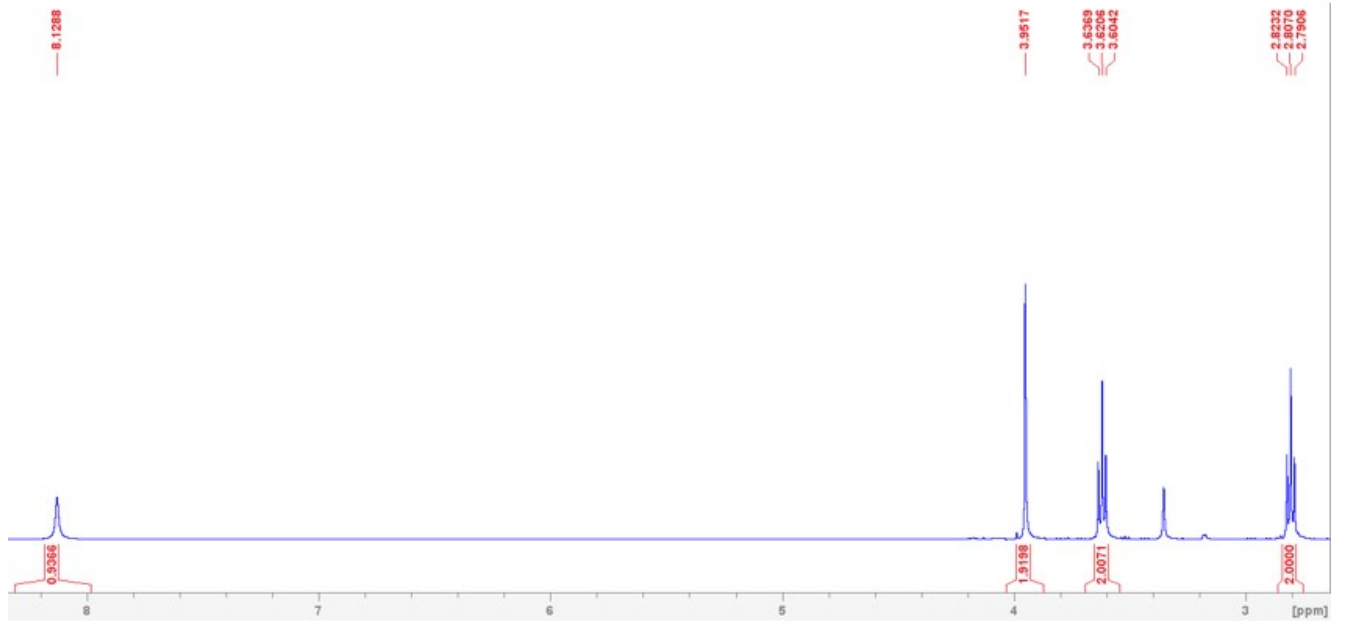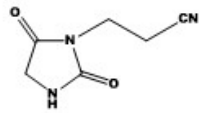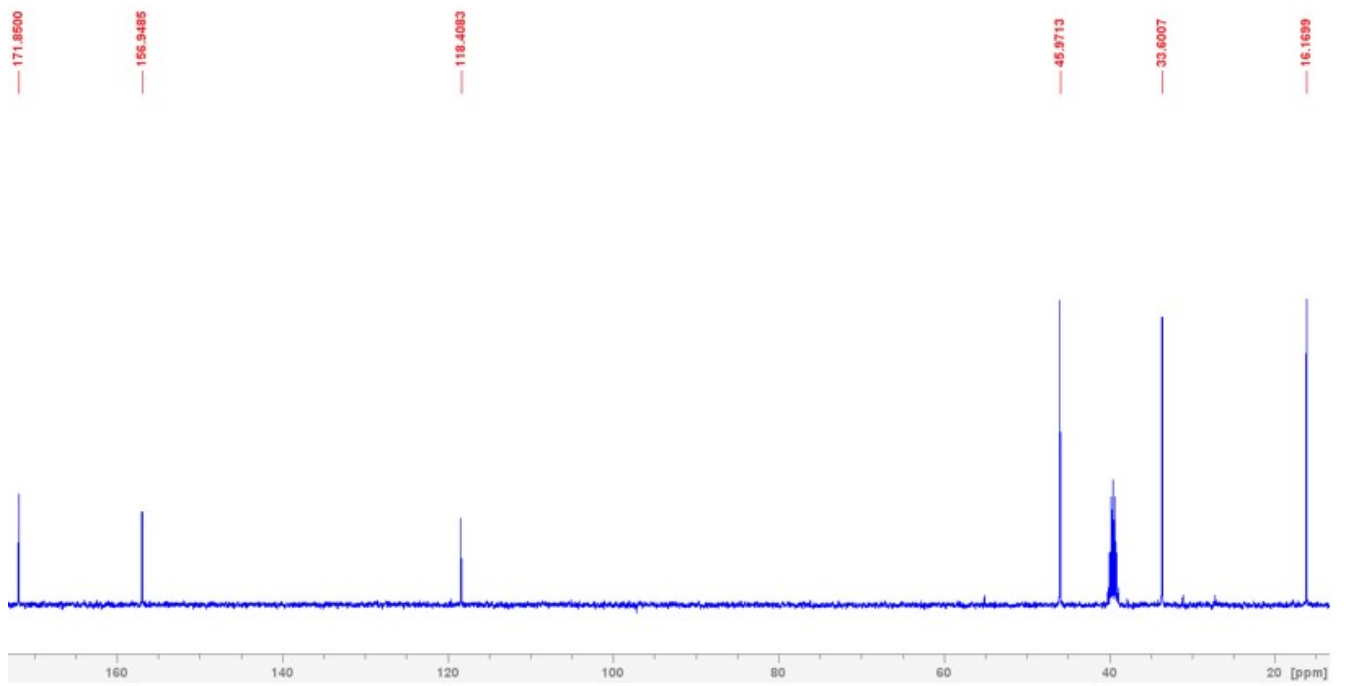

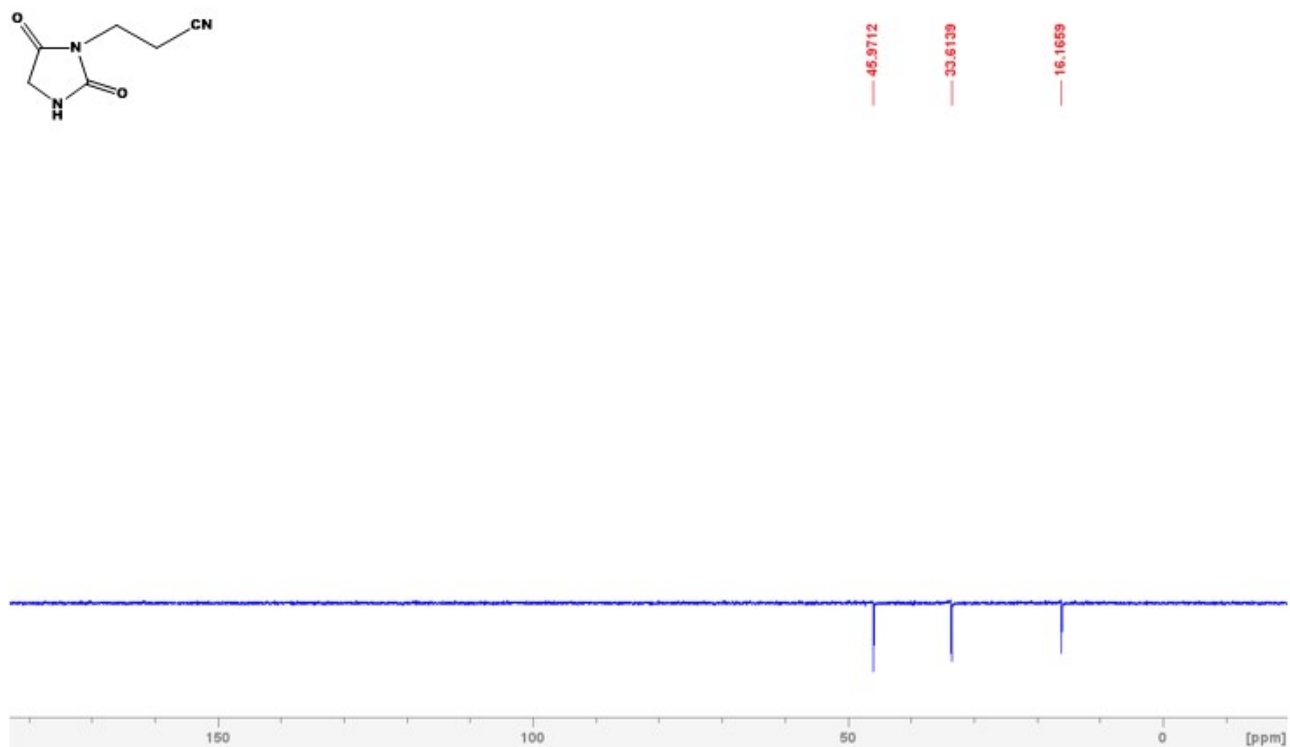

Fig. S9. 400 MHz  $^1\text{H}$ -NMR/ $^{13}\text{C}$ -NMR/ DEPT spectra in DMSO, 300 K, of 3-(2,5-Dioximidazolidin-1-yl)propanenitrile (12).

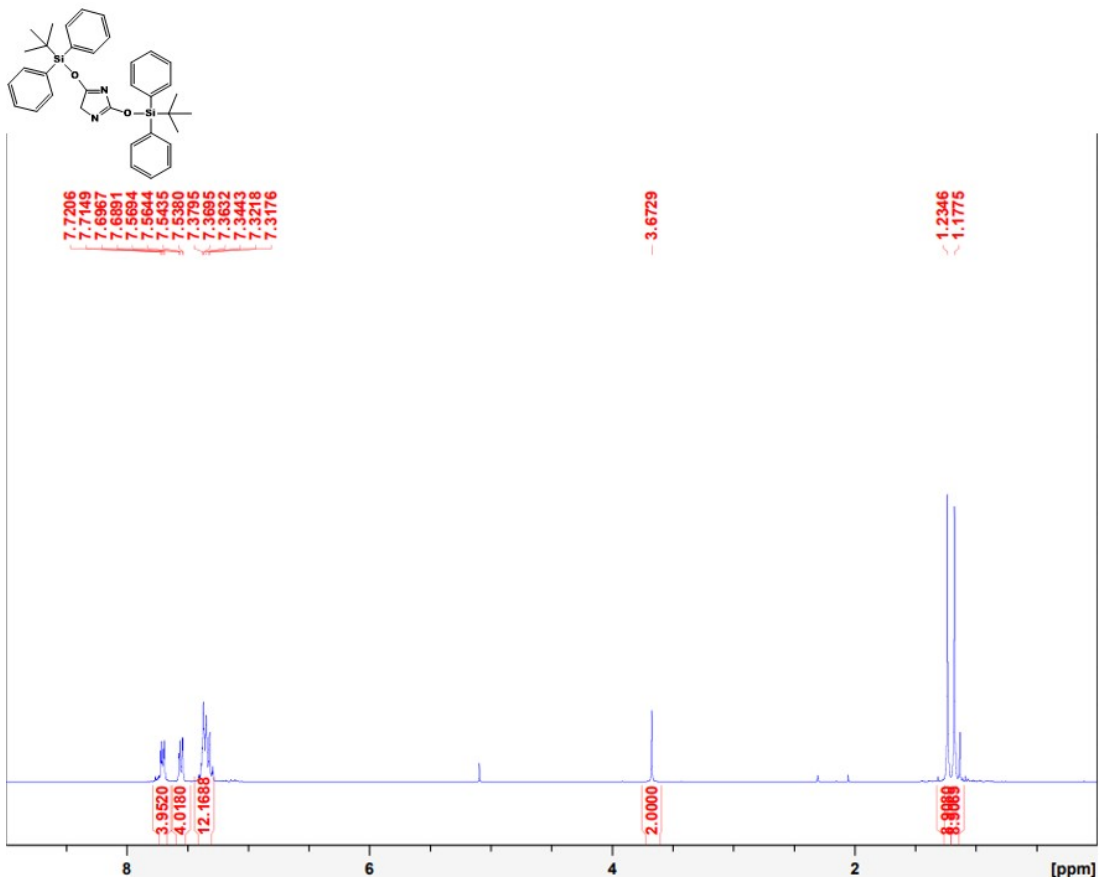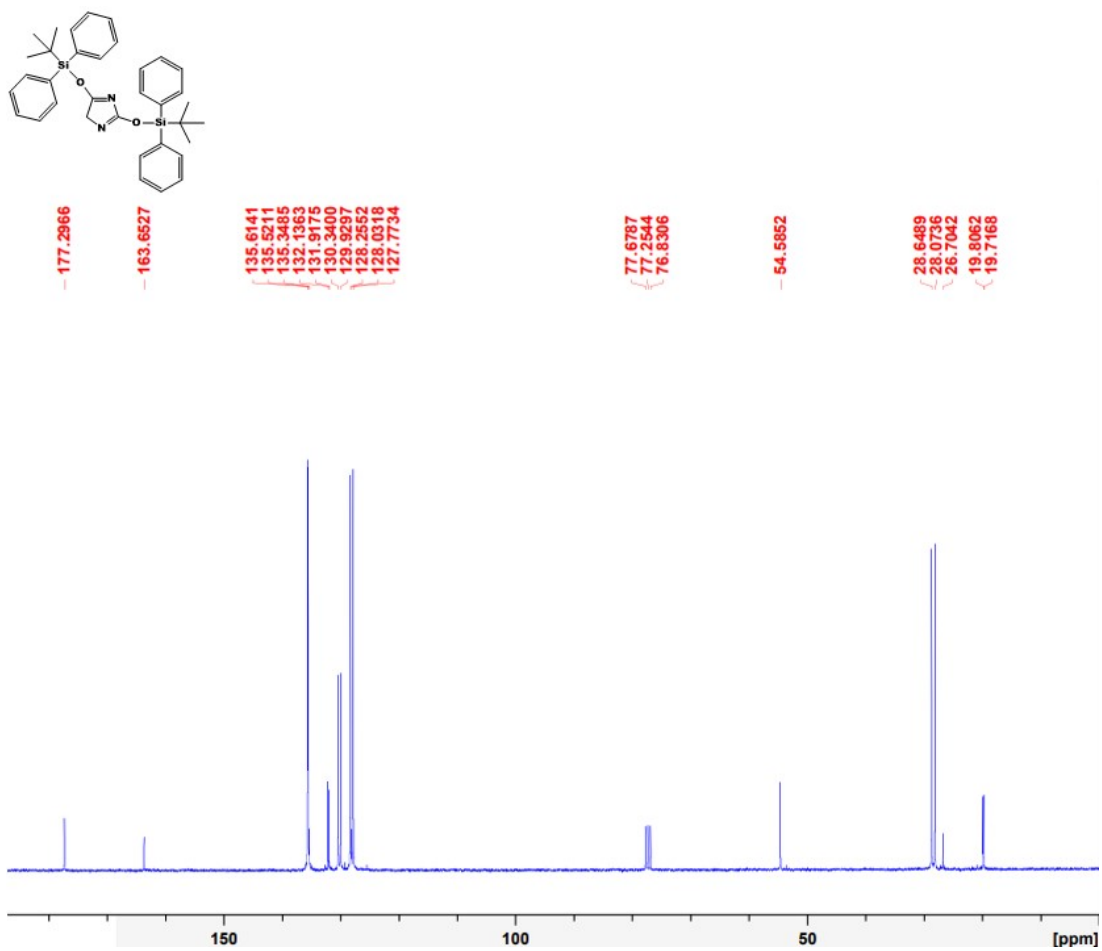

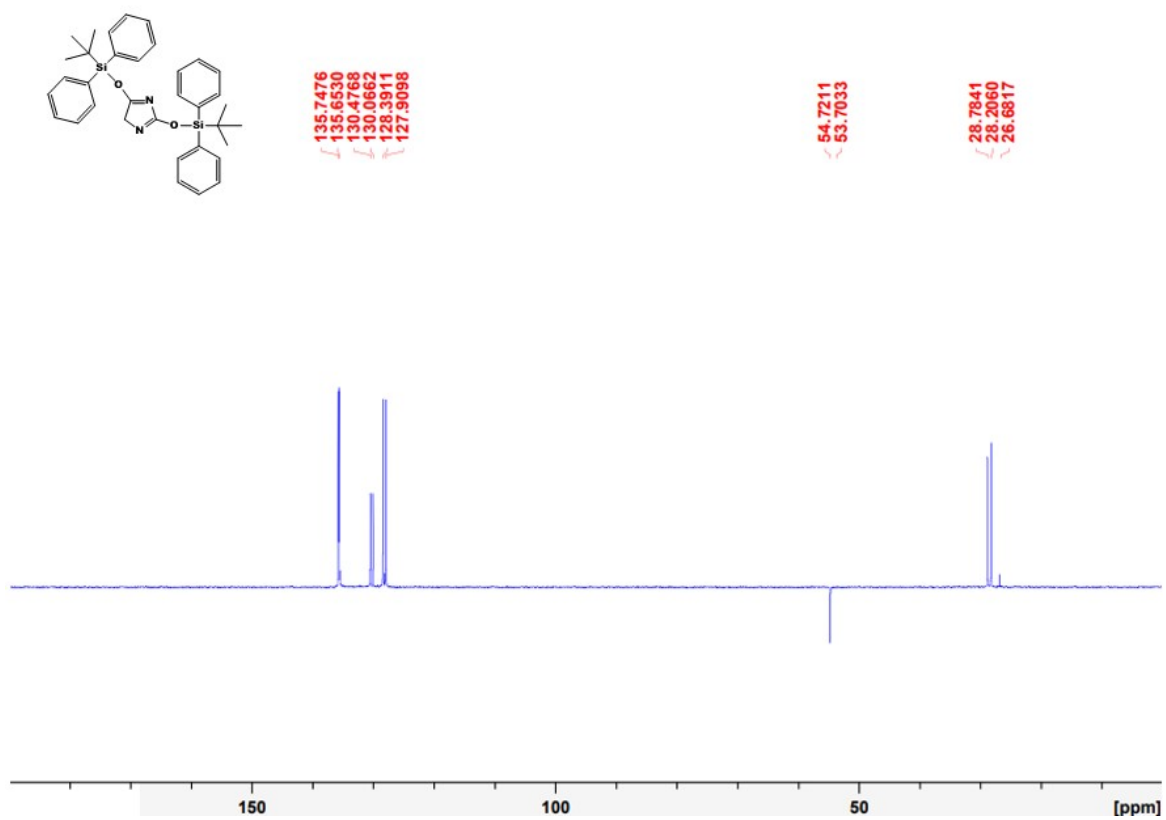

Fig. S10. 300 MHz <sup>1</sup>H-NMR/<sup>13</sup>C-NMR/ DEPT spectra in CDCl<sub>3</sub>, at 300 K, of 2,5-bis((*tert*-butyldiphenylsilyl)oxy)-4*H*-imidazole (17).

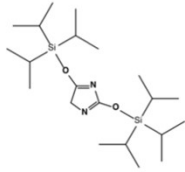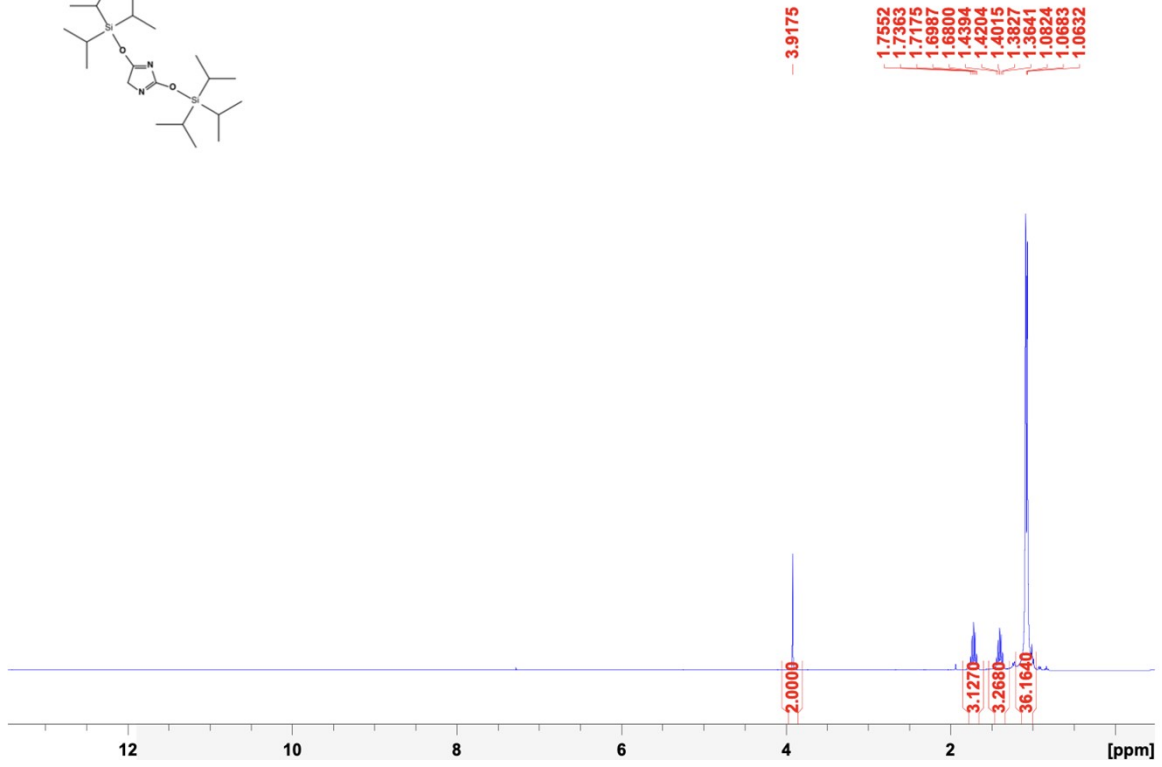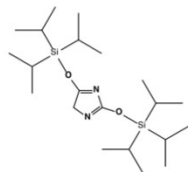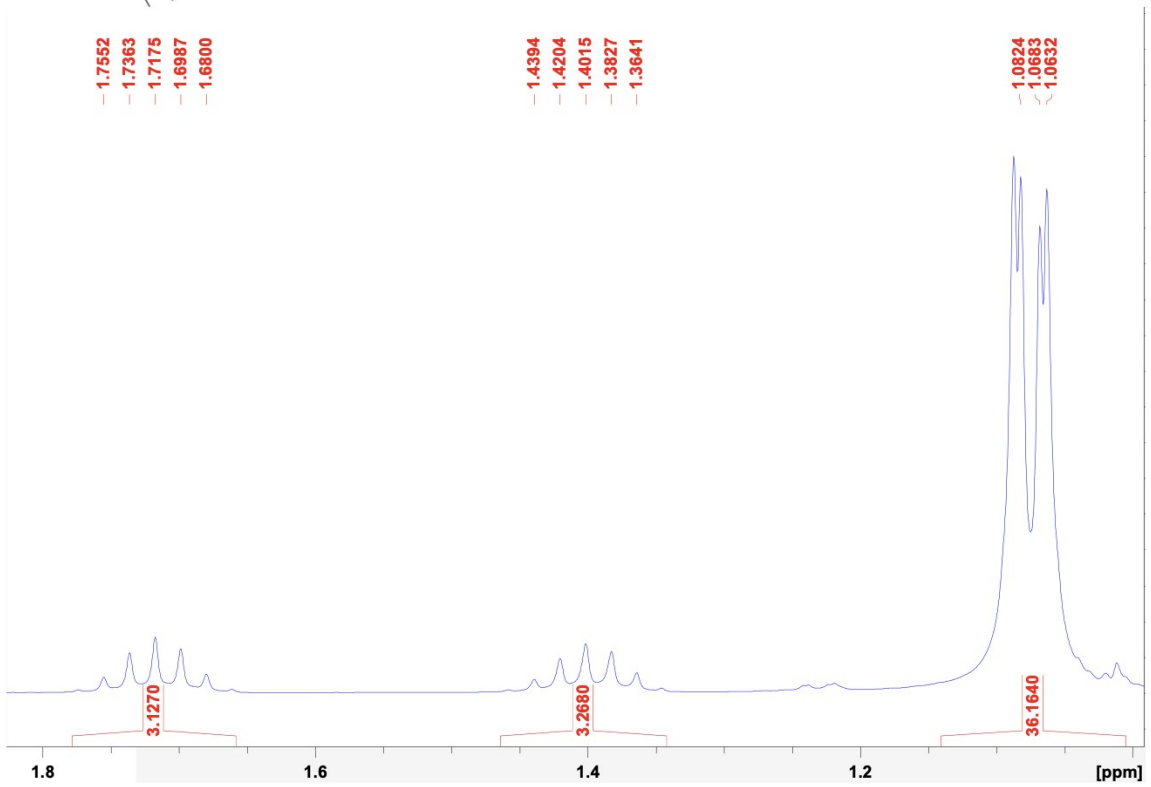



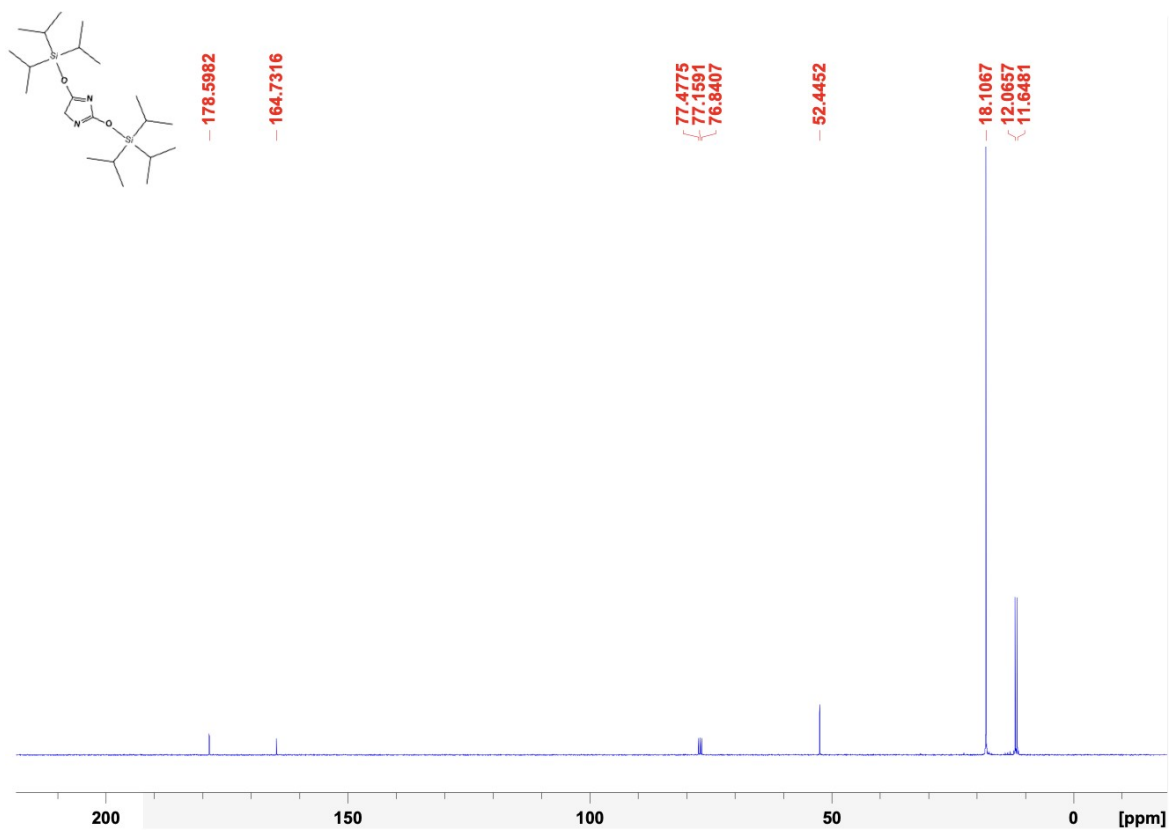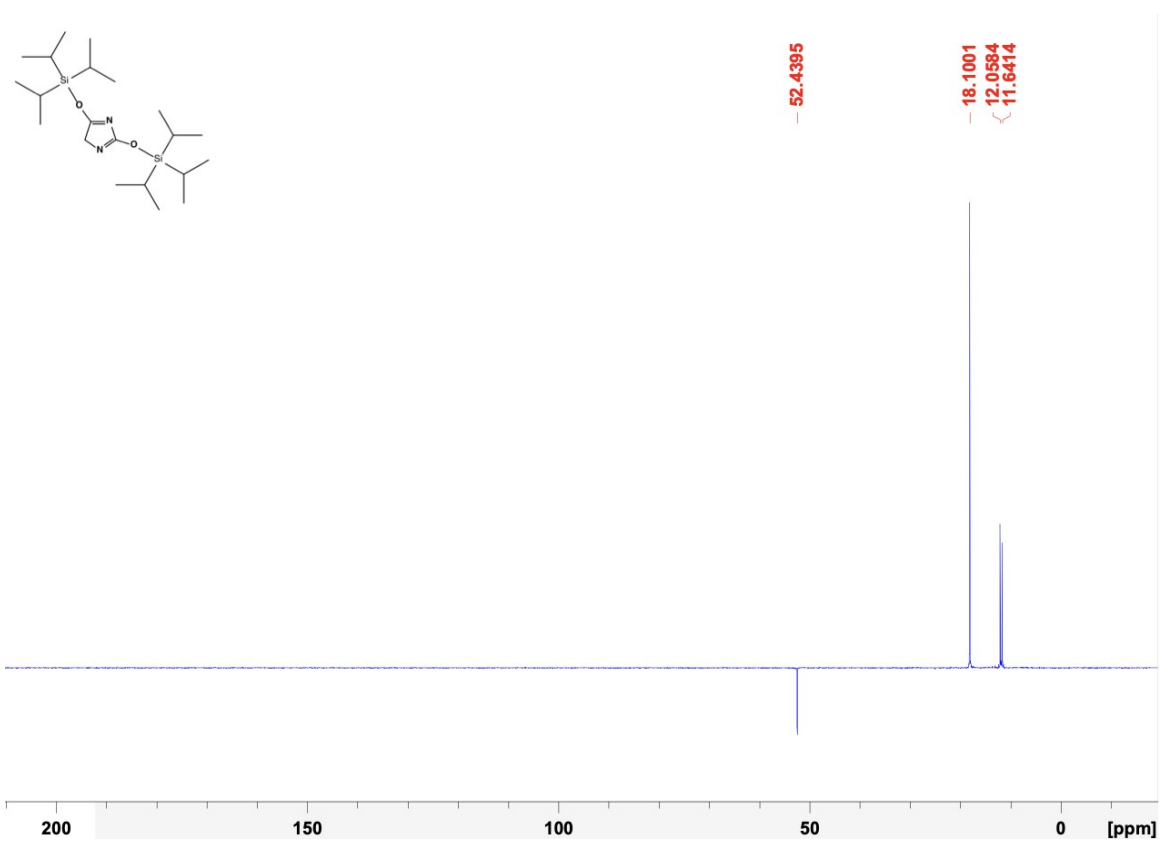

Fig. S11. 400 MHz <sup>1</sup>H-NMR/<sup>13</sup>C-NMR/ DEPT spectra in CDCl<sub>3</sub>, 300 K, of 2,5-bis((Triisopropylsilyl)oxy)-4H-imidazole (18).

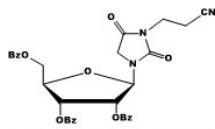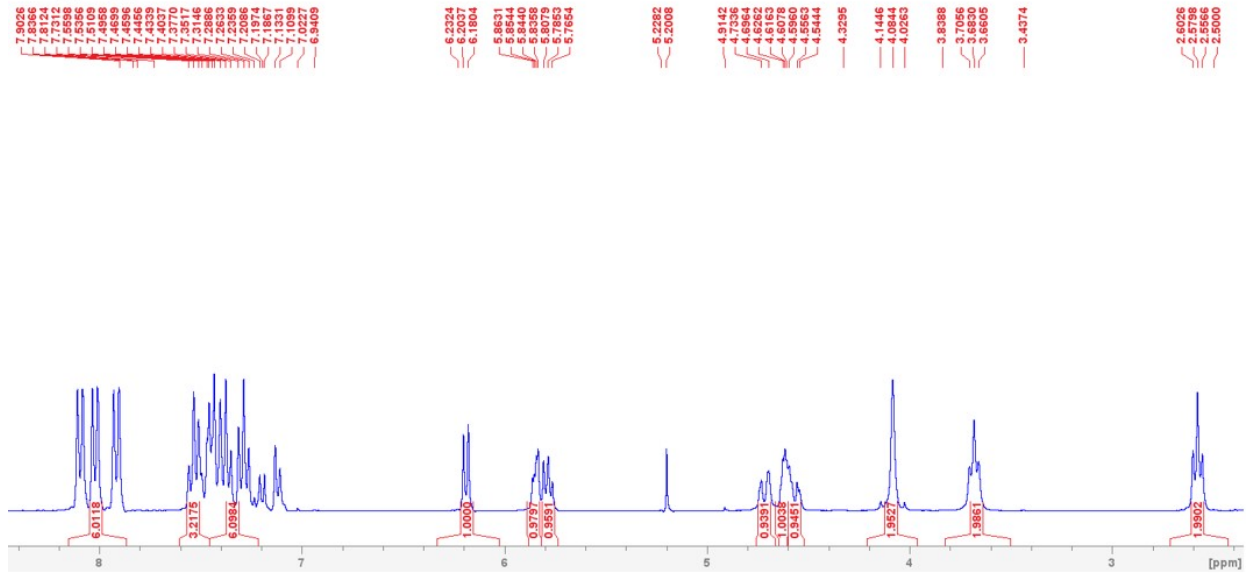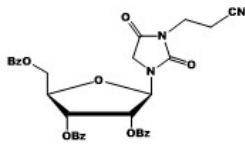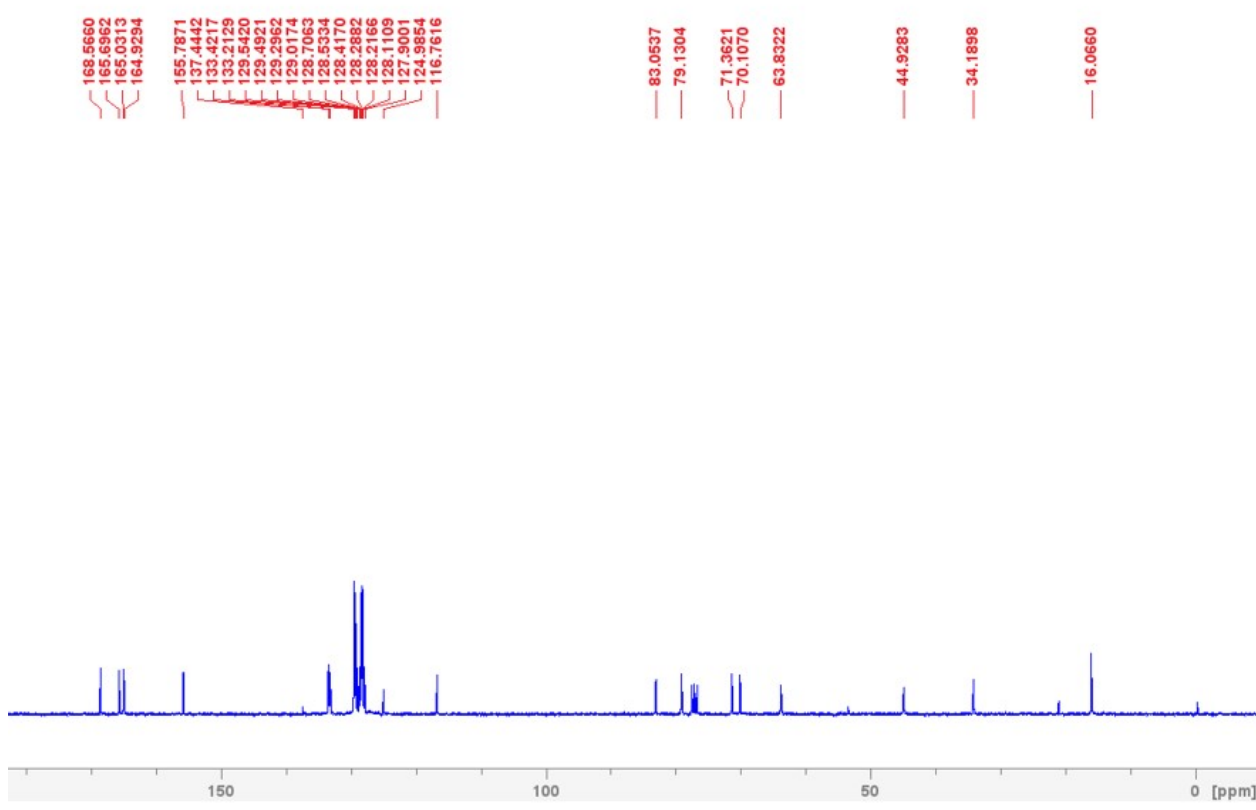

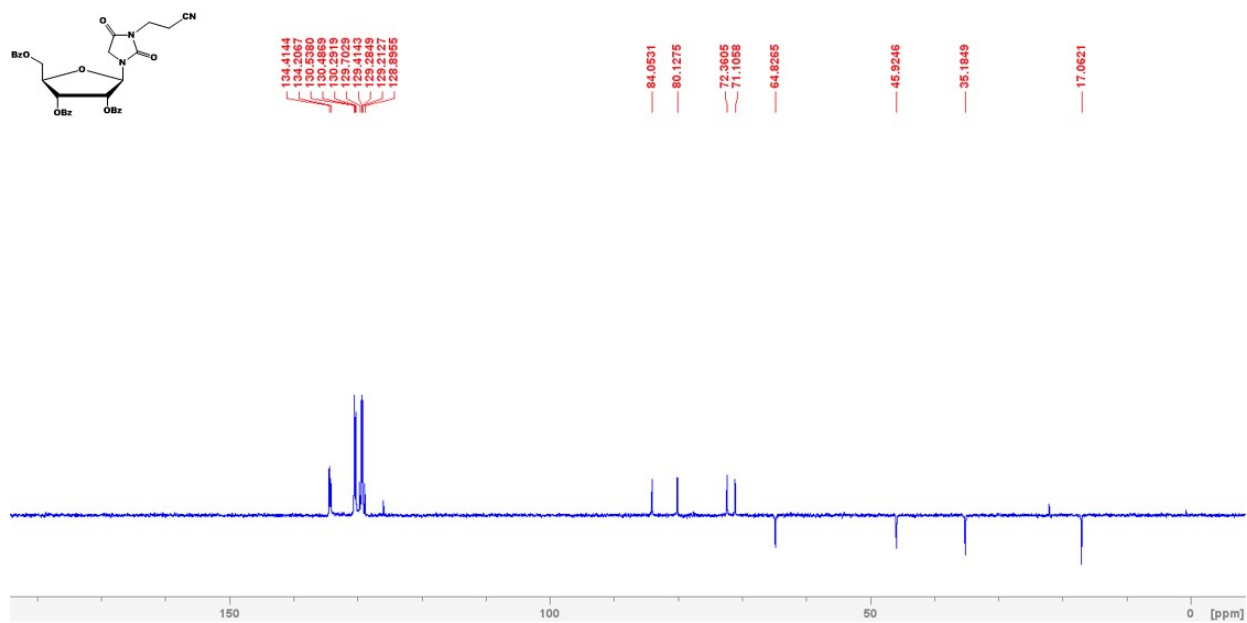

Fig. S12. 300 MHz <sup>1</sup>H-NMR/<sup>13</sup>C-NMR/ DEPT spectra in CDCl<sub>3</sub>, 300 K, of (2R,3R,4R,5R)-2-((Benzoyloxy)methyl)-5-(3-(2-cyanoethyl)-2,4-dioximidazolidin-1-yl)tetrahydrofuran-3,4-diyl dibenzoate (14).

## Tables

Table S1. Crystal data and structure refinement for HR.

|                                             |                                                               |
|---------------------------------------------|---------------------------------------------------------------|
| Identification code                         | HR                                                            |
| Empirical formula                           | C <sub>8</sub> H <sub>12</sub> N <sub>2</sub> O <sub>6</sub>  |
| Formula weight                              | 232.20                                                        |
| Temperature/K                               | ?                                                             |
| Crystal system                              | orthorhombic                                                  |
| Space group                                 | P2 <sub>1</sub> 2 <sub>1</sub> 2 <sub>1</sub>                 |
| a/Å                                         | 9.08590(10)                                                   |
| b/Å                                         | 9.16110(10)                                                   |
| c/Å                                         | 11.4717(2)                                                    |
| α/°                                         | 90                                                            |
| β/°                                         | 90                                                            |
| γ/°                                         | 90                                                            |
| Volume/Å <sup>3</sup>                       | 954.87(2)                                                     |
| Z                                           | 4                                                             |
| ρ <sub>calc</sub> /cm <sup>3</sup>          | 1.615                                                         |
| μ/mm <sup>-1</sup>                          | 1.214                                                         |
| F(000)                                      | 488.0                                                         |
| Crystal size/mm <sup>3</sup>                | 0.35 × 0.2 × 0.1                                              |
| Radiation                                   | ? (λ = 1.54184)                                               |
| 2θ range for data collection/°              | 12.364 to 149.344                                             |
| Index ranges                                | -9 ≤ h ≤ 10, -11 ≤ k ≤ 11, -14 ≤ l ≤ 14                       |
| Reflections collected                       | 10131                                                         |
| Independent reflections                     | 1910 [R <sub>int</sub> = 0.0181, R <sub>sigma</sub> = 0.0115] |
| Data/restraints/parameters                  | 1910/0/148                                                    |
| Goodness-of-fit on F <sup>2</sup>           | 1.061                                                         |
| Final R indexes [I ≥ 2σ (I)]                | R <sub>1</sub> = 0.0243, wR <sub>2</sub> = 0.0629             |
| Final R indexes [all data]                  | R <sub>1</sub> = 0.0245, wR <sub>2</sub> = 0.0631             |
| Largest diff. peak/hole / e Å <sup>-3</sup> | 0.17/-0.21                                                    |

|                 |          |
|-----------------|----------|
| Flack parameter | -0.06(5) |
|-----------------|----------|

Table S2. Fractional Atomic Coordinates ( $\times 10^4$ ) and Equivalent Isotropic Displacement Parameters ( $\text{\AA}^2 \times 10^3$ ) for HR.  $U_{\text{eq}}$  is defined as 1/3 of the trace of the orthogonalised  $U_{ij}$  tensor.

| Atom | x          | y          | z          | U(eq)   |
|------|------------|------------|------------|---------|
| O1   | 7434.1(13) | 5586.7(12) | 5367.3(10) | 15.5(3) |
| O2   | 6221.4(15) | 2733.6(13) | 4288.8(11) | 22.4(3) |
| O3   | 6148.8(15) | 4158.2(14) | 7771.4(10) | 22.1(3) |
| O4   | 3994.9(14) | 5958.3(13) | 6872.8(11) | 19.5(3) |
| O5   | 6967.0(13) | 9537.1(13) | 6101.1(11) | 16.5(3) |
| O6   | 4824.0(14) | 9296.9(13) | 2507.7(11) | 19.2(3) |
| N1   | 5905.2(16) | 7598.2(15) | 5105.1(12) | 14.5(3) |
| N2   | 5886.8(16) | 9780.4(15) | 4277.6(12) | 14.7(3) |
| C1   | 7372.5(18) | 4129.3(17) | 5865.0(14) | 15.0(3) |
| C2   | 7565(2)    | 3032.3(18) | 4891.8(16) | 19.8(4) |
| C3   | 5916.0(19) | 4018.9(18) | 6549.3(14) | 15.9(3) |
| C4   | 5067.3(18) | 5357.9(18) | 6118.2(14) | 14.7(3) |
| C5   | 6303.6(18) | 6444.9(18) | 5886.1(15) | 14.5(3) |
| C6   | 6322.7(17) | 9015.9(18) | 5261.2(14) | 13.5(3) |
| C7   | 5292.3(18) | 8897.4(18) | 3453.4(15) | 14.6(3) |
| C8   | 5321.5(19) | 7362.4(18) | 3934.3(15) | 15.5(3) |

Table S3. Anisotropic Displacement Parameters ( $\text{\AA}^2 \times 10^3$ ) for HR. The Anisotropic displacement factor exponent takes the form:  $-2\pi^2[h^2a^*2U_{11}+2hka^*b^*U_{12}+\dots]$ .

| Atom | $U_{11}$ | $U_{22}$ | $U_{33}$ | $U_{23}$ | $U_{13}$ | $U_{12}$ |
|------|----------|----------|----------|----------|----------|----------|
| O1   | 15.9(6)  | 10.5(5)  | 20.1(6)  | 2.2(5)   | 3.5(5)   | 0.8(5)   |
| O2   | 32.9(7)  | 13.7(6)  | 20.6(6)  | 1.3(5)   | -7.8(6)  | -3.0(5)  |
| O3   | 26.6(7)  | 24.2(6)  | 15.5(6)  | 5.8(5)   | -0.1(5)  | 1.5(6)   |
| O4   | 18.9(6)  | 19.5(6)  | 20.1(6)  | 4.9(5)   | 5.0(5)   | 3.0(5)   |
| O5   | 17.2(6)  | 15.2(6)  | 17.1(6)  | -2.7(5)  | -1.0(5)  | -1.6(5)  |

|    |         |         |         |         |         |         |
|----|---------|---------|---------|---------|---------|---------|
| O6 | 24.0(6) | 17.4(6) | 16.1(5) | 1.3(5)  | -2.9(5) | 1.1(5)  |
| N1 | 18.8(7) | 10.8(6) | 13.8(6) | -0.3(5) | -1.7(6) | -1.5(6) |
| N2 | 16.8(7) | 10.7(6) | 16.7(7) | 0.7(5)  | -1.4(6) | -0.9(5) |
| C1 | 16.4(8) | 10.6(7) | 18.1(8) | 2.2(6)  | -2.3(7) | 0.3(6)  |
| C2 | 23.0(9) | 13.9(7) | 22.7(9) | -0.9(7) | -0.6(7) | 2.6(7)  |
| C3 | 18.0(8) | 13.1(8) | 16.6(8) | 1.3(6)  | -1.2(7) | -1.2(7) |
| C4 | 15.5(8) | 12.7(7) | 15.8(7) | 1.3(6)  | -0.2(6) | -0.3(6) |
| C5 | 16.3(8) | 11.5(7) | 15.7(8) | -0.1(6) | 0.2(6)  | 0.8(6)  |
| C6 | 12.0(7) | 12.5(7) | 16.1(8) | -0.9(6) | 2.7(6)  | 0.5(6)  |
| C7 | 13.5(7) | 14.2(8) | 16.2(8) | 0.0(6)  | 1.6(6)  | 0.9(6)  |
| C8 | 18.3(8) | 12.7(7) | 15.4(7) | -0.3(6) | -2.3(7) | -0.1(7) |

Table S4. Bond Lengths for HR.

| Atom | Atom | Length/Å   | Atom | Atom | Length/Å |
|------|------|------------|------|------|----------|
| O1   | C1   | 1.4531(18) | N1   | C8   | 1.460(2) |
| O1   | C5   | 1.424(2)   | N2   | C6   | 1.386(2) |
| O2   | C2   | 1.430(2)   | N2   | C7   | 1.357(2) |
| O3   | C3   | 1.424(2)   | C1   | C2   | 1.512(2) |
| O4   | C4   | 1.415(2)   | C1   | C3   | 1.542(2) |
| O5   | C6   | 1.224(2)   | C3   | C4   | 1.531(2) |
| O6   | C7   | 1.221(2)   | C4   | C5   | 1.525(2) |
| N1   | C5   | 1.432(2)   | C7   | C8   | 1.511(2) |
| N1   | C6   | 1.365(2)   |      |      |          |

Table S5. Bond Angles for HR.

| Atom | Atom | Atom | Angle/°    | Atom | Atom | Atom | Angle/°    |
|------|------|------|------------|------|------|------|------------|
| C5   | O1   | C1   | 108.38(12) | O4   | C4   | C5   | 111.12(13) |
| C5   | N1   | C8   | 123.94(14) | C5   | C4   | C3   | 102.04(13) |
| C6   | N1   | C5   | 123.36(14) | O1   | C5   | N1   | 109.16(13) |
| C6   | N1   | C8   | 111.24(14) | O1   | C5   | C4   | 104.11(13) |
| C7   | N2   | C6   | 112.33(14) | N1   | C5   | C4   | 113.89(14) |
| O1   | C1   | C2   | 108.43(13) | O5   | C6   | N1   | 127.39(15) |
| O1   | C1   | C3   | 107.06(12) | O5   | C6   | N2   | 125.47(15) |
| C2   | C1   | C3   | 115.56(15) | N1   | C6   | N2   | 107.14(14) |
| O2   | C2   | C1   | 112.68(15) | O6   | C7   | N2   | 125.39(16) |
| O3   | C3   | C1   | 111.59(14) | O6   | C7   | C8   | 127.54(15) |
| O3   | C3   | C4   | 108.73(13) | N2   | C7   | C8   | 107.07(14) |
| C4   | C3   | C1   | 102.43(13) | N1   | C8   | C7   | 101.81(13) |
| O4   | C4   | C3   | 117.44(13) |      |      |      |            |

Table S6. Torsion Angles for HR.

| A  | B  | C  | D  | Angle/°     | A  | B  | C  | D  | Angle/°     |
|----|----|----|----|-------------|----|----|----|----|-------------|
| O1 | C1 | C2 | O2 | -83.23(17)  | C3 | C4 | C5 | N1 | 159.25(13)  |
| O1 | C1 | C3 | O3 | -102.40(15) | C5 | O1 | C1 | C2 | 137.08(14)  |
| O1 | C1 | C3 | C4 | 13.76(16)   | C5 | O1 | C1 | C3 | 11.77(16)   |
| O3 | C3 | C4 | O4 | -35.6(2)    | C5 | N1 | C6 | O5 | -6.5(3)     |
| O3 | C3 | C4 | C5 | 86.09(15)   | C5 | N1 | C6 | N2 | 173.24(14)  |
| O4 | C4 | C5 | O1 | 166.44(13)  | C5 | N1 | C8 | C7 | -172.72(15) |
| O4 | C4 | C5 | N1 | -74.77(17)  | C6 | N1 | C5 | O1 | -104.63(17) |
| O6 | C7 | C8 | N1 | -176.35(17) | C6 | N1 | C5 | C4 | 139.51(16)  |
| N2 | C7 | C8 | N1 | 3.40(17)    | C6 | N1 | C8 | C7 | -6.13(18)   |
| C1 | O1 | C5 | N1 | -154.73(13) | C6 | N2 | C7 | O6 | -179.94(16) |
| C1 | O1 | C5 | C4 | -32.76(16)  | C6 | N2 | C7 | C8 | 0.30(18)    |

|    |    |    |    |             |    |    |    |    |             |
|----|----|----|----|-------------|----|----|----|----|-------------|
| C1 | C3 | C4 | O4 | -153.83(14) | C7 | N2 | C6 | O5 | 175.48(16)  |
| C1 | C3 | C4 | C5 | -32.11(15)  | C7 | N2 | C6 | N1 | -4.23(19)   |
| C2 | C1 | C3 | O3 | 136.72(15)  | C8 | N1 | C5 | O1 | 60.4(2)     |
| C2 | C1 | C3 | C4 | -107.12(15) | C8 | N1 | C5 | C4 | -55.5(2)    |
| C3 | C1 | C2 | O2 | 36.9(2)     | C8 | N1 | C6 | O5 | -173.13(16) |
| C3 | C4 | C5 | O1 | 40.47(15)   | C8 | N1 | C6 | N2 | 6.56(19)    |

Table S7. Hydrogen Atom Coordinates ( $\text{\AA}\times 10^4$ ) and Isotropic Displacement Parameters ( $\text{\AA}^2\times 10^3$ ) for HR.

| Atom | x       | y        | z       | U(eq) |
|------|---------|----------|---------|-------|
| H2   | 6121.42 | 3327.34  | 3736.43 | 34    |
| H3   | 6183.93 | 3324.89  | 8075.6  | 33    |
| H4   | 3920.36 | 5434.65  | 7470.94 | 29    |
| H2A  | 5984.54 | 10730.74 | 4196.89 | 18    |
| H1   | 8208.28 | 4016.78  | 6425.03 | 18    |
| H2B  | 8298.55 | 3410.23  | 4329.46 | 24    |
| H2C  | 7954.56 | 2110.94  | 5220.79 | 24    |
| H3A  | 5380.31 | 3095.34  | 6359.62 | 19    |
| H4A  | 4585.52 | 5109.59  | 5359.9  | 18    |
| H5   | 6660.87 | 6864.35  | 6639.52 | 17    |
| H8A  | 4322.46 | 6932.28  | 3959.49 | 19    |
| H8B  | 5974.94 | 6722.6   | 3469.66 | 19    |



| H'  | Split (Hz)    | Chemical shift (ppm) |           | Coupling constants (Hz) |     |      |
|-----|---------------|----------------------|-----------|-------------------------|-----|------|
|     | HR            | U                    | HR        |                         | U   | HR   |
| 1'  | d 6.6         | 5.90                 | 5.61      | 1'2'                    | 4.4 | 6.6  |
| 2'  | t 5.4         | 4.34                 | 4.23      | 2'3'                    | 5.3 | 5.4  |
| 3'  | dd 5.4, 3.5   | 4.22                 | 4.14      | 3'4'                    | 5.5 | 3.5  |
| 4'  | q 3.6, 4.9    | 4.13                 | 4.01      | 4'5'                    | 3.0 | 4.9  |
| 5'  | dd 12.5, 3.58 | 3.91                 | 3.67      | 4'5''                   | 4.4 | 3.6  |
| 5'' | dd 12.5, 3.58 | 3.80                 | 3.75      | 5'5''                   |     | 12.5 |
| 5   | d 17.35       |                      | 4.14,4.21 |                         |     |      |

Table S8. Chemical shifts and coupling constants of HR, 15, and uridine, U, in D<sub>2</sub>O solution.<sup>1</sup>

Table S9. Chemical shifts (ppm) for monomeric ( $\delta_0$ ) and self-stacked ( $\delta_\infty$ ) HR and uridine.

| compound | H5         |                 |                | H6         |                 |                | H1'        |                 |                |
|----------|------------|-----------------|----------------|------------|-----------------|----------------|------------|-----------------|----------------|
|          | $\delta_0$ | $\delta_\infty$ | $\Delta\delta$ | $\delta_0$ | $\delta_\infty$ | $\Delta\delta$ | $\delta_0$ | $\delta_\infty$ | $\Delta\delta$ |
| U        | 5.90       | 5.85            | 0.05           | 7.87       | 7.84            | 0.03           | 5.91       | 5.88            | 0.03           |
| HR       | 4.22       | 4.22            | 0.00           | -          | -               | -              | 5.61       | 5.60            | 0.01           |

## Equations

Eqn. S1. Equations used for the calculation of S/N conformers' population.<sup>2</sup>

1.  $J_{1'2'} = 9.3(1 - X_N) = 9.3X_S$
2.  $J_{3'4'} = 9.3X_N$

Eqn. S2. Equations used for the calculation of populations of conformers *gg*, *tg*, and *gt*. (3)-(5).<sup>2</sup>

3.  $\rho_{gg} = (J_t + J_g) - (J_{4'5'} + J_{4'5''}) / (J_t - J_g)$
4.  $\rho_{tg} = (J_{4'5''} - J_g) / (J_t - J_g)$
5.  $\rho_{gt} = (J_{4'5'} - J_g) / (J_t - J_g)$

The coupling constants for pure rotamers were estimated as  $J_g$  2.04 Hz (*gauche* rotamer) and  $J_t$  11.72 (*trans* rotamer) for the C4'-C5' bond.<sup>3</sup>

Eqn. S3. Equation used for the calculation of the glycosidic angle of HR.<sup>4</sup>

$$6. \quad {}^3J_{C2/4-H1'} = 4.7\cos^2(\chi - 60^\circ) + 2.3\cos(\chi - 60^\circ) + 0.1$$

## Experimental

### General

Commercial reagents and solvents were used without further purification unless otherwise noted. All moisture-sensitive reactions were carried out in flame-dried reaction flasks with rubber septa, and the reagents were introduced with a syringe. All reactants in moisture-sensitive reactions were dried overnight in a vacuum oven. Progress of reactions was monitored by TLC on precoated Merck silica gel plates (60F-254). Visualization was accomplished by UV light. Compounds were characterized by nuclear magnetic resonance using Bruker, DPX-300 and DMX-500 spectrometers. <sup>1</sup>H NMR spectra were measured at 300, 400, 500 and 700 MHz. Chemical shifts are expressed in ppm, downfield from Me<sub>4</sub>Si (TMS), used as internal standard. Liquid chromatography (LC) was performed using CombiFlash NextGen 300+ (Nebraska, USA) with silica gel columns. Purification of HR was achieved on a CombiFlash RF+ Teledyne ISCO system (Nebraska, USA) using a C18, reverse phase column. High-resolution mass spectra were recorded on an AutoSpec-ESI mass spectrometer.

### 3-(2,5-Dioxoimidazolidin-1-yl)propanenitrile (**12**)

Hydantoin (15.0 g, 150 mmol) was dissolved in deionized water (150 mL) under nitrogen atmosphere. Diisopropylethylamine (DIPEA; 2.61 mL, 15 mmol) was then added, followed by acrylonitrile (8.19 mL, 125 mmol). The reaction mixture was stirred at 80°C under a nitrogen atmosphere for 16 h. Progress was monitored by TLC using chloroform/ethanol (9:1) eluent system and KMnO<sub>4</sub> staining. Upon completion of the reaction, the solvent was evaporated under reduced pressure, affording a sticky white crude product. This residue was purified by silica gel column chromatography, employing a gradient eluent system of chloroform and ethanol (10:0 v/v to 8.5:1.5 v/v). Pure 3-(2,5-dioxoimidazolidin-1-yl) propanenitrile, **12**, was isolated as a white powder in 85% yield (10.16 g; >95% purity according to <sup>1</sup>H NMR). <sup>1</sup>H NMR (400 MHz, DMSO): δ 8.13 (s, NH1), 3.95 (s, 1H, H5), 3.62 (t, J = 6.5 Hz, 2H, N3(CH2CH2CN)), 2.8 (t, J = 6.5, 2H, CH2CH2CN) ppm. <sup>13</sup>C NMR (400 MHz, DMSO): δ 171.85 (C4), 156.94 (C2), 118.4 (CN), 45.97 (C5), 33.6 (N3(CH2CH2CN)), 16.17 (CH2CH2CN) ppm. HRMS (m/z) negative: calcd. For C<sub>6</sub>H<sub>7</sub>N<sub>3</sub>O<sub>2</sub> 153.0538; found 153.0539.

### (2R,3R,4R,5R)-2-((Benzoyloxy)methyl)-5-(3-(2-cyanoethyl)-2,4dioxoimidazolidin-1-yl)tetrahydrofuran-3,4-diyl dibenzoate (**14**)

3-(2,5-dioxoimidazolidin-1-yl)propanenitrile, **12**, (1.0 g, 6.53 mmol) was dissolved in dry MeCN (25 mL). HMDS (2.74 mL, 13.06 mmol) and TMSCl (0.20 mL) were added, and the mixture was heated under reflux for 1 h under N<sub>2</sub> atmosphere. Then, MeCN and HMDS were evaporated under reduced pressure. The residue was dissolved in

dry MeCN (30 mL).  $\beta$ -D-Ribofuranose 1-acetate 2,3,5-tribenzoate, **7**, (2.63 g, 5.22 mmol) was added, followed by TMSOTf (0.95 mL, 5.22 mmol) and stirred under N<sub>2</sub> atmosphere overnight at RT. The reaction mixture was diluted with DCM (60 mL) and washed with saturated NaHCO<sub>3</sub> solution (90 mL). The organic phase was treated with brine and dried over MgSO<sub>4</sub>. TLC (toluene:ethyl acetate 2 : 1) showed complete consumption of the  $\beta$ -D-ribofuranose, **7**. After evaporation of the solvent under reduced pressure, a white-brownish residue was obtained. The crude product was purified by silica column chromatography using toluene: ethyl acetate (8: 2) eluent mixture to give pure product **14** as a white powder in 70% yield (2.18 g) and > 95% purity by <sup>1</sup>H NMR. <sup>1</sup>H NMR (300 MHz, CDCl<sub>3</sub>):  $\delta$  8.13-7.91(3d, 6H, O-Bz), 7.6-7.45(m, 3H, P-Bz), 7.4-7.2(m, 6H, m-Bz), 6.2 (d, J =7 Hz, 1H, H1'), 5.85 (dd, J =5.61, 2.51 Hz, 1H, H3'), 5.78 (t, J =6.2 Hz, 1H, H2'), 4.72 (dd, J =11.2, 2.03 Hz, 1H, H5'), 4.61 (q, J = 2.6 Hz, 1H, H4'), 4.57 (dd, J =11.73, 3.74 Hz, 1H, H5''), 4.08 (t, J =17.5 Hz, 2H, H5), 3.68 (t, J = 6.75 Hz, 2H, N3(CH<sub>2</sub>CH<sub>2</sub>CN)), 2.57 (t, J = 6.9, 2H, CH<sub>2</sub>CH<sub>2</sub>CN) ppm. <sup>13</sup>C NMR (300 MHz, CDCl<sub>3</sub>):  $\delta$  168.56 (C4), 165.7, 165.03, 165 (CO), 155.78 (C2), 133.42-128 (C-Ar), 116.76 (CN), 83.05 (C1'), 79.13 (C4'), 71.36 (C3'), 70.1 (C2'), 63.83 (C5'), 44.92 (C5), 34.18 (N3(CH<sub>2</sub>CH<sub>2</sub>CN)), 16.06 (CH<sub>2</sub>CH<sub>2</sub>CN) ppm. HRMS (m/z) positive: calcd. For C<sub>32</sub>H<sub>27</sub>N<sub>3</sub>O<sub>9</sub> 579.1747; found 579.1763.

**(2R,3R,4R,5R)-2-((Benzoyloxy)methyl)-5-(2,4-dioximidazolidin-1 yl) tetrahydrofuran-3,4-diyl dibenzoate (9)**

A mixture of tert-butanol (10 mL) and THF (10 mL) was stirred under an argon atmosphere at 40°C in the presence of 3 Å molecular sieves. Concurrently, (2R,3R,4R,5R)-2-((benzoyloxy)methyl)-5-(3-(2-cyanoethyl)-2,4-dioximidazolidin-1-yl)tetrahydrofuran-3,4-diyl dibenzoate, **14**, (0.500 g, 0.837 mmol) was dissolved in anhydrous THF (5 mL). This solution was then added dropwise to the preheated reaction mixture, followed by (0.63 mL, 1.05 mmol) 20% w/v solution of potassium tert-butoxide in THF. The reaction was stirred for 1 h at 40°C under an argon atmosphere, and reaction progress was monitored by TLC using toluene:ethyl acetate (2:1) as the eluent system and UV visualization. After completion, the reaction mixture was acidified with a few drops of formic acid and the solid was filtered. The filtrate was concentrated under reduced pressure, and the resulting crude product was purified by silica gel column chromatography employing a gradient eluent of toluene:ethyl acetate (5:0 v/v to 4:1 v/v). Pure product **9** was isolated as a white powder in 31% yield (0.32 g) and >95% purity by <sup>1</sup>H NMR. <sup>1</sup>H NMR (700 MHz, CDCl<sub>3</sub>):  $\delta$  8.12-7.91(3d, 6H, O-Bz), 7.62-7.55(m, 3H, P-Bz), 7.53-7.35(m, 6H, m-Bz), 6.12 (d, J =7.81 Hz, 1H, H1'), 5.81 (dd, J =5.84, 2.5 Hz, 1H, H3'), 5.68 (dd, J =5.88, 7.88 Hz, 1H, H2'), 4.77 (dd, J =12.3, 3.01 Hz, 1H, H5'), 4.61 (q, J =2.86 Hz, 1H, H4'), 4.57 (dd, J =12.3, 3.5 Hz, 1H, H5''), 4.07 (d, J =16.8 Hz, 1H, H5), 4.01 (d, J =16.8 Hz, 1H, H5) ppm. <sup>13</sup>C NMR (700 MHz, CDCl<sub>3</sub>):  $\delta$  168.66 (C4), 166.1, 165.46, 165.31 (CO), 155.74 (C2), 133.96-128.32 (C-Ar), 82.84 (C1'), 79.74 (C4'), 71.76 (C3'), 69.95 (C2'), 64.1 (C5'), 46.12 (C5) ppm. HRMS (m/z) positive: calcd. For C<sub>29</sub>H<sub>24</sub>N<sub>2</sub>O<sub>9</sub> 544.1466; found 544.1540.

**1-((2R,3R,4S,5R)-3,4-Dihydroxy-5-(hydroxymethyl)tetrahydrofuran-2-yl)imidazolidine-2,4-dione (15)**

(2R,3R,4R,5R)-2-((Benzoyloxy)methyl)-5-(2,4-dioximidazolidin-1-yl)tetrahydrofuran-3,4-diyl dibenzoate, **9**, (0.45 g, 0.83 mmol) was suspended in 7 N methanolic ammonia solution (60 mL) at room temperature. After 72 h, the reaction was complete as indicated by TLC using H<sub>2</sub>O/n-butanol/acetic acid (5:4:1) as the eluent system. The solvent was evaporated under reduced pressure, and the resulting crude product was dissolved in a biphasic

mixture of water and diethyl ether (45 mL of each). The layers were separated, and the aqueous phase was washed with diethyl ether (45 mL x 2). Following evaporation of the aqueous phase under reduced pressure, the crude product was freeze dried. The dry crude product was then purified by medium pressure LC Reverse Phase C18 employing a gradient of water:acetonitrile (9.9:0.1 v/v to 9.8:0.2 v/v). Pure product **15** was isolated as a white powder in 90% yield (0.174 g), and >95% purity by <sup>1</sup>H NMR. <sup>1</sup>H NMR (700 MHz, D<sub>2</sub>O): δ 5.61 (d, J = 6.6 Hz, 1H), 4.23 (t, J = 5.4 Hz, 1H), 4.21 (d, J = 17.35 Hz, 1H), 4.14 (m, J = 17.35, 5.4, 3.5 Hz, 2H), 4.01 (q, J = 4.9, 3.6 Hz, 1H), 3.75 (dd, J = 12.5, 3.58 Hz, 1H), 3.67 (dd, J = 12.5, 3.58 Hz, 1H) ppm. <sup>13</sup>C NMR (700 MHz, D<sub>2</sub>O): δ 174.7 (C4), 159.2 (C2), 84.9 (C1'), 84.2 (C4'), 71.6 (C2'), 70.7 (C3'), 62 (C5'), 47.3 (C5) ppm. HRMS (m/z) negative: calcd. For C<sub>8</sub>H<sub>12</sub>N<sub>2</sub>O<sub>6</sub> 232.0694; found 232.0620.

### **2,5-Bis((tert-butyldimethylsilyl)oxy)-4H-imidazole (16)**

Hydantoin (1.00 g, 10 mmol, 1 eq) and t-butyldimethylsilyl chloride (TBDMS-Cl) (3.61 g, 24 mmol, 2.4 eq) were dissolved in anhydrous acetonitrile (50 mL) under an argon atmosphere. Triethylamine (TEA; 7.0 mL, 50 mmol, 5 eq) was then injected, and the reaction mixture was stirred at room temperature for 3 days. Reaction progress was monitored by TLC using DCM: Hexane (7:3) as the eluent system. After completion, the reaction mixture was concentrated under reduced pressure. The resulting crude product was dissolved in DCM (90 mL) and washed with dilute HCl solution (pH 3) (30 mLx3). The organic layer was subsequently treated with brine and dried over MgSO<sub>4</sub>. The oily yellowish crude product was purified by silica gel column chromatography employing DCM:Hexane (70:30 v/v). Pure bis-silylated hydantoin, **16**, was isolated as a white powder in 75% yield (2.47 g). and >95% purity by <sup>1</sup>H NMR. <sup>1</sup>H NMR (400 MHz, CDCl<sub>3</sub>): δ 3.85 (s, 2H), 0.96 (s, 18H), 0.44 (s, 6H), 0.3 (s, 6H) ppm. <sup>13</sup>C NMR (400 MHz, CDCl<sub>3</sub>): δ 178.06(C4), 163.80(C2), 52.22 (C5), 26.4(SiC(CH<sub>3</sub>)<sub>3</sub>), 19.1(SiC(CH<sub>3</sub>)<sub>3</sub>), -4.9((CH<sub>3</sub>)<sub>2</sub>SiC(CH<sub>3</sub>)<sub>3</sub>) ppm. HRMS (m/z) positive: calcd. for C<sub>15</sub>H<sub>32</sub>N<sub>2</sub>O<sub>2</sub>Si<sub>2</sub> 328.2005; found 328.2080.

### **(2R,3R,4R,5R)-2-((Benzoyloxy)methyl)-5-(2,4-dioximidazolidin-1yl) tetrahydrofuran-3,4-diyl dibenzoate (9)**

2,5-Bis((tert-butyldimethylsilyl)oxy)-4H-imidazole, **16**, (1.0 g, 3.04 mmol) and β-D-ribofuranose 1-acetate 2,3,5-tribenzoate, **7**, (1.23 g, 2.43 mmol) was dissolved in dry MeCN (30 mL). TMSOTf (0.49 mL, 2.68 mmol) was added, and the mixture was stirred under Ar atmosphere at 0°C to 25°C for overnight. The reaction mixture was diluted with DCM (120 mL) and washed with saturated NaHCO<sub>3</sub> solution (180 mL). The organic phase was treated with brine and dried over MgSO<sub>4</sub>. TLC (toluene: ethyl acetate 2: 1) showed complete consumption of the β-D-ribofuranose, **7**. The solvent was evaporated under reduced pressure to obtain a brownish residue. The crude product was purified by silica gel column chromatography employing toluene: ethyl acetate (50:50 v/v) eluent. Pure product **9** was isolated as a white powder in 34% yield (0.29 g) and >95% purity by <sup>1</sup>H NMR. <sup>1</sup>H NMR (700 MHz, CDCl<sub>3</sub>): δ 8.12-7.91(3d, J = 8.37 Hz, 6H, O-Bz), 7.62-7.55(m, J = 8.0 Hz, 3H, P-Bz), 7.53-7.35(m, J = 7.81 Hz, 6H, m-Bz), 6.12 (d, J = 7.88 Hz, 1H, H1'), 5.81 (dd, J = 5.85, 2.47 Hz, 1H, H3'), 5.68 (dd, J = 8.12, 5.88 Hz, 1H, H2'), 4.77 (dd, J = 12.11, 2.92 Hz, 1H, H5'), 4.61 (q, J = 3.12, 2.89 Hz, 1H, H4'), 4.57 (dd, J = 12.11, 3.70 Hz, 1H, H5''), 4.07/4.01 (dd, J = 38.20, 16.76 Hz, 2H) ppm. <sup>13</sup>C NMR (700 MHz, CDCl<sub>3</sub>): δ 168.66 (C4), 166.1, 165.46, 165.31 (CO),

155.74 (C2), 133.96-128.32 (C-Ar), 82.84 (C1'), 79.74 (C4'), 71.76 (C3'), 69.95 (C2'), 64.1 (C5'), 46.12 (C5) ppm. HRMS (m/z) positive: calcd. For C<sub>29</sub>H<sub>24</sub>N<sub>2</sub>O<sub>9</sub> 544.1466; found 544.154.

#### **2,5-Bis((*tert*-butyldiphenylsilyl)oxy)-4H-imidazole (17)**

Hydantoin (1.00 g, 10 mmol, 1 eq) and *t*-butyldiphenylsilyl chloride (TBDPS-Cl) (6.25 mL, 24 mmol, 2.4 eq) were dissolved in anhydrous acetonitrile (37 mL) under an argon atmosphere. Triethylamine (TEA; 7.0 mL, 50 mmol, 5 eq) was then injected, and the reaction mixture was stirred at room temperature for 3 days. Reaction progress was monitored by TLC using DCM: Hexane (7:3) as the eluent system. After completion, the reaction mixture was concentrated under reduced pressure. The resulting crude product was dissolved in DCM (90 mL) and washed with dilute HCl solution (pH 3) (30 mLx3). The organic layer was subsequently treated with brine and dried over MgSO<sub>4</sub>. The oily yellowish crude product was purified by silica gel column chromatography employing DCM: Hexane (70:30 v/v) eluent. Pure *N*-silylated hydantoin, **17**, was isolated as a white powder in 70% yield (4.05 g) and >95% purity by <sup>1</sup>H NMR. <sup>1</sup>H NMR (300 MHz, CDCl<sub>3</sub>): δ 7.7-7.3(H-Ar, 20H), 3.67 (s, 2H), 1.2 (s, 18H) ppm. <sup>13</sup>C NMR (300 MHz, CDCl<sub>3</sub>): δ 177.3(C4), 163.65(C2), 136-128(C-Ar), 54.6(C5), 28.4(SiC(CH<sub>3</sub>)<sub>3</sub>), 19.76(SiC(CH<sub>3</sub>)<sub>3</sub>) ppm. HRMS (m/z) positive: Calcd. for C<sub>35</sub>H<sub>40</sub>N<sub>2</sub>O<sub>2</sub>Si<sub>2</sub> 576.2628; found 576.2645.

#### **2,5-Bis((*Triisopropyl silyl*)oxy)-4H-imidazole (18)**

Hydantoin (0.5 g, 5 mmol, 1 eq) and triisopropylsilyl chloride (TIPS-Cl) (2.56 mL, 12 mmol, 2.4 eq) were dissolved in anhydrous acetonitrile (19 mL) under an argon atmosphere. Triethylamine (TEA, 3.5 mL, 25 mmol, 5 eq) was then injected, and the reaction mixture was stirred at room temperature for 3 days. Reaction progress was monitored by TLC using DCM: Hexane (7:3) as the eluent system. After completion, the reaction mixture was concentrated under reduced pressure. The resulting crude product was dissolved in DCM (60 mL) and washed with dilute HCl solution (pH 3) (20 mLx3). The organic layer was subsequently treated with brine and dried over MgSO<sub>4</sub>. The oily yellowish crude product was purified by silica gel column chromatography employing an isocratic eluent of DCM: Hexane (70:30 v/v). Pure bis-silylated hydantoin, **18**, was isolated as a white powder in 40% yield (2 g) and >95% purity as determined by <sup>1</sup>H NMR. <sup>1</sup>H NMR (400 MHz, CDCl<sub>3</sub>): δ 3.91 (s, 2H), 1.71(C2-O-Si-(CH(CH<sub>3</sub>)<sub>2</sub>)<sub>3</sub>) (heptet, J = 7.62 Hz, 3H), 1.4(C4-O-Si-(CH(CH<sub>3</sub>)<sub>2</sub>)<sub>3</sub>) (heptet, J = 7.62 Hz, 3H), 1.08(C2/4-O-Si-(CH(CH<sub>3</sub>)<sub>2</sub>)<sub>3</sub>) (dd, J = 7.63, 2.12 Hz, 36H) ppm. <sup>13</sup>C NMR (400 MHz, CDCl<sub>3</sub>): δ 178.60(C4), 164.73(C2), 52.44(C5), 18.10(Si(CH(CH<sub>3</sub>)<sub>2</sub>)<sub>3</sub>), 12.06(C2-O-Si-(CH(CH<sub>3</sub>)<sub>2</sub>)<sub>3</sub>), 11.64(C4-O-Si-(CH(CH<sub>3</sub>)<sub>2</sub>)<sub>3</sub>) ppm. HRMS (m/z) Positive: calcd. For C<sub>21</sub>H<sub>44</sub>N<sub>2</sub>O<sub>2</sub>Si<sub>2</sub> 412.2941; found 412.2945.

#### **(2*R*,3*R*,4*R*,5*R*)-2-((benzoyloxy)methyl)-5-(2,5-dioximidazolidin-1-yl)tetrahydrofuran-3,4-diyl dibenzoate (8)**

Solutions of chloroacetyl chloride (0.1 mL, 1.27 mmol) in DCM, and 0.5 M NaOH (8.2 mL, 4 equiv) in distilled water were added dropwise (during half an hour) from two dropping funnels to compound **10** (570 mg, 1.02 mmol) in DCM (10 mL) in a three necked round bottomed flask. Two phases (aqueous and organic solutions) were formed. The aqueous layer was discarded, and the organic layer was washed with water, dried and concentrated. Pure product **8** was isolated as a white powder in 87% yield (0.181 g) and >95% purity by <sup>1</sup>H NMR.

$^1\text{H}$  NMR (500 MHz,  $\text{CDCl}_3$ ):  $\delta$  8.10-7.91(3d,  $J = 7.85$  Hz, 6H, O-Bz), 7.52(m,  $J = 7.37$  Hz, 3H, P-Bz), 7.41-7.33(m,  $J = 7.5$  Hz, 6H, m-Bz), 6.30 (dd,  $J = 6.1, 3.5$  Hz, 1H, H-3'), 6.07 (dd,  $J = 8.12, 5.88$  Hz, 1H, H2'), 5.94 (d,  $J = 3.58$  Hz, 1H, H1'), 4.74 (dd,  $J = 11.47, 3.45$  Hz, 1H, H5'), 4.66 (q,  $J = 5.76, 4.24$  Hz, 1H, H4'), 4.62 (dd,  $J = 11.47, 5.50$  Hz, 1H, H5''), 3.98 (s, 2H) ppm.  $^{13}\text{C}$  NMR (500 MHz,  $\text{CDCl}_3$ ):  $\delta$  170.24 (C4), 166.29, 165.49, 165.21 (CO), 156.31 (C2), 133.59-128.34 (C-Ar), 83.63 (C1'), 79.30 (C4'), 72.51 (C3'), 71.34 (C2'), 63.76 (C5'), 46.20 (C5) ppm. HRMS ( $m/z$ ) positive: Calcd. for  $\text{C}_{29}\text{H}_{24}\text{N}_2\text{O}_9$  544.1466; found 544.154.

### **pK<sub>a</sub> measurements**

Dilute HCl and NaOH solutions were added to 0.1 M HR in  $\text{D}_2\text{O}$  to reach the following pH values: 7.5, 8, 8.4, 9.15, 9.5, 9.8, 10.15, 11, 11.5, 12.8, 13, 13.5. Apparent pH values were measured with a Hanna instruments pH meter equipped with an electrode. pH is estimated from the pH meter measurement, (apparent reading from pH meter) - 0.41.  $^{13}\text{C}$ -NMR spectra were measured in  $\text{D}_2\text{O}$  at 500 MHz. The data were collected at 300 K.  $^{13}\text{C}$ -NMR chemical shift of the bases' carbonyls were monitored as a function of pH. The chemical shifts of C2 and C4 were plotted vs. pH and a sigmoid curve was obtained. The pK<sub>a</sub> value was obtained from the inflection point, which was determined by the second derivative of the fitted sigmoid function using Python.

### **Monitoring base pairing of HR with A/G**

HR (74.26 mg), adenosine (53.42 mg), and guanosine (57.84 mg) in volumetric flasks were stored under vacuum overnight to remove absorbed water. 0.1 M HR and 0.1 M adenosine solutions in dry  $\text{DMSO-d}_6$  were prepared.  $^1\text{H}$ -NMR spectra were measured at 500 MHz. The data were collected at 300 K.  $^1\text{H}$ -NMR spectra were obtained across a range of ratios between 0.1 M HR and 0.1 M adenosine. The final volume of the solution in the tube was 1 mL. This protocol was repeated for guanosine.

### **Monitoring base stacking of HR**

HR (111.4 mg) in a volumetric flask was dried under vacuum overnight. 0.003, 0.025, 0.04, 0.05, 0.25, and 0.4 M solutions were prepared.  $\text{NaNO}_3$  was added to increase the ionic strength to 0.1 M.  $^1\text{H}$ -NMR spectra of these solutions were measured in  $\text{D}_2\text{O}$  at 500 MHz. The data were collected at 300 K.

### **References:**

1. T. Ginsburg-Shmuel, M. Haas, M. Schumann, G. Reiser, O. Kalid, N. Stern and B. Fischer, *J Med Chem*, 2010, 53(4), 1673-1685.
2. H. Salameh, M. Afri, H. E. Gottlieb and B. Fischer, *ACS Omega*, 2020, 5(48), 31314–31322.

3. Hruska, F. E.; Grey, A. A.; Smith, I. C., Nuclear magnetic resonance study of the molecular conformation of. beta.-pseudouridine in aqueous solution. *J. Am. Chem. Soc.* **1970**, *92* (13), 4088-4094.
4. Donohue, J.; Trueblood, K. N., Base pairing in DNA. *J. Mol. Biol* **1960**, *2* (6), 363-371.
5. Stern, N.; Major, D. T.; Gottlieb, H. E.; Weizman, D.; Fischer, B., What is the conformation of physiologically-active dinucleoside polyphosphates in solution? Conformational analysis of free dinucleoside polyphosphates by NMR and molecular dynamics simulations. *Org. biomol. Chem.* **2010**, *8* (20), 4637-4652.
6. Ippel, J. H.; Wijmenga, S. S.; de Jong, R.; Heus, H. A.; Hilbers, C. W. Heteronuclear Scalar Coupling in the Bases and Sugar Rings of Nucleic Acids: Their Determination and Application in Assignment and Conformational Analysis. *Magn. Reson. Chem.* 1996, *34*, S156-S176.
